# Supplementary material
Source: PubMed Central journal article supplement (PMC6925349)
Supplement: NIHMS1538027-supplement-3.pdf [file NIHMS1538027-supplement-3.pdf]

**Partial Loss of USP9X Function Leads to a  
Male Neurodevelopmental and Behavioral  
Disorder Converging on Transforming  
Growth Factor  $\beta$  Signaling**

**SUPPLEMENTAL INFORMATION**

This file contains 17 Figures (Figure S1-S17), 7 Tables (Table S1-S7) and 1 Clinical Data Description

# **SUPPLEMENTAL FIGURES S1-S17**

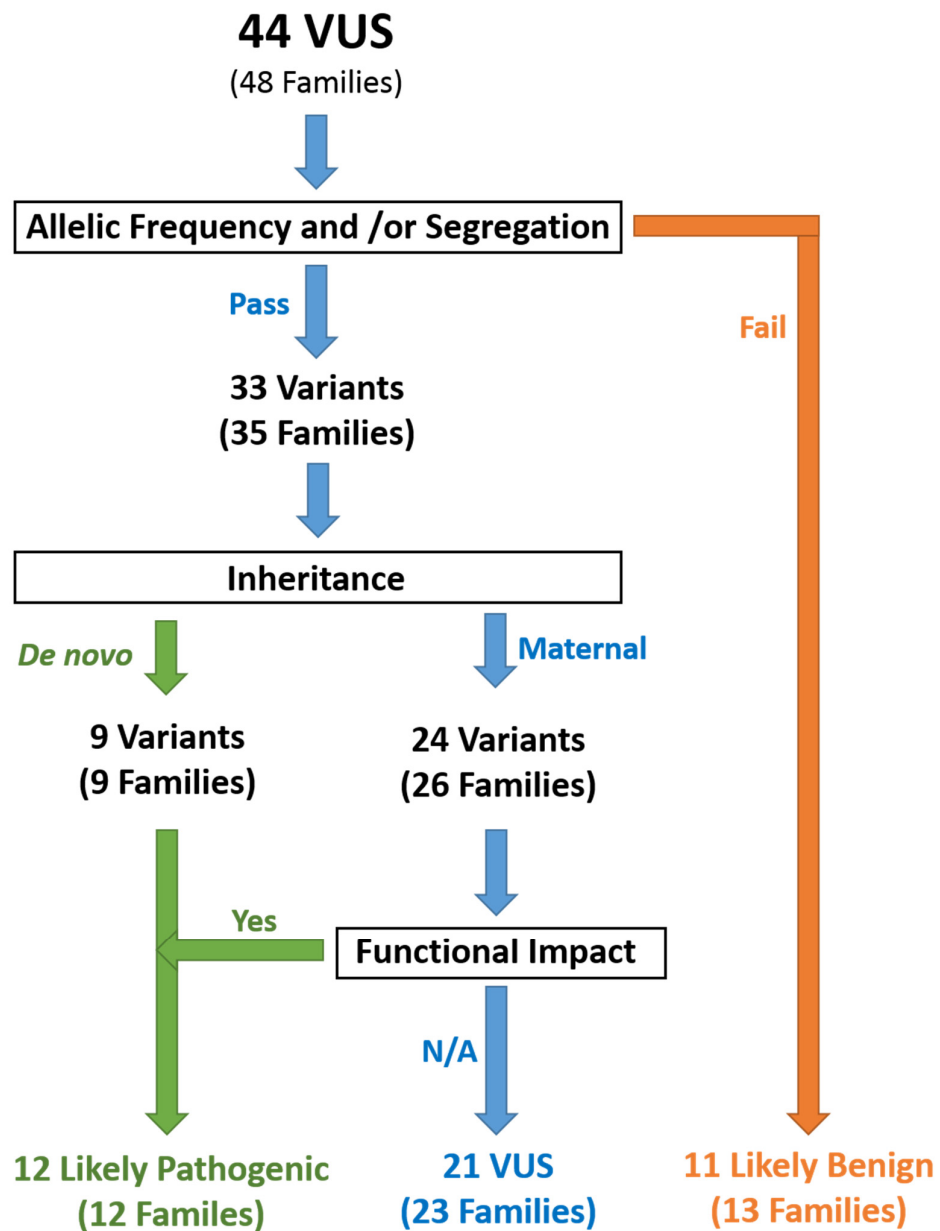

**Figure S1. Overview of classification of *USP9X* male variants.** Fail at ‘Allelic Frequency and/or Segregation’ based on either being found in > 1: 10000 alleles, or having >4 alleles found in hemizygous state in gnomAD (genome and exome) data base, or being discovered in a healthy male relative.

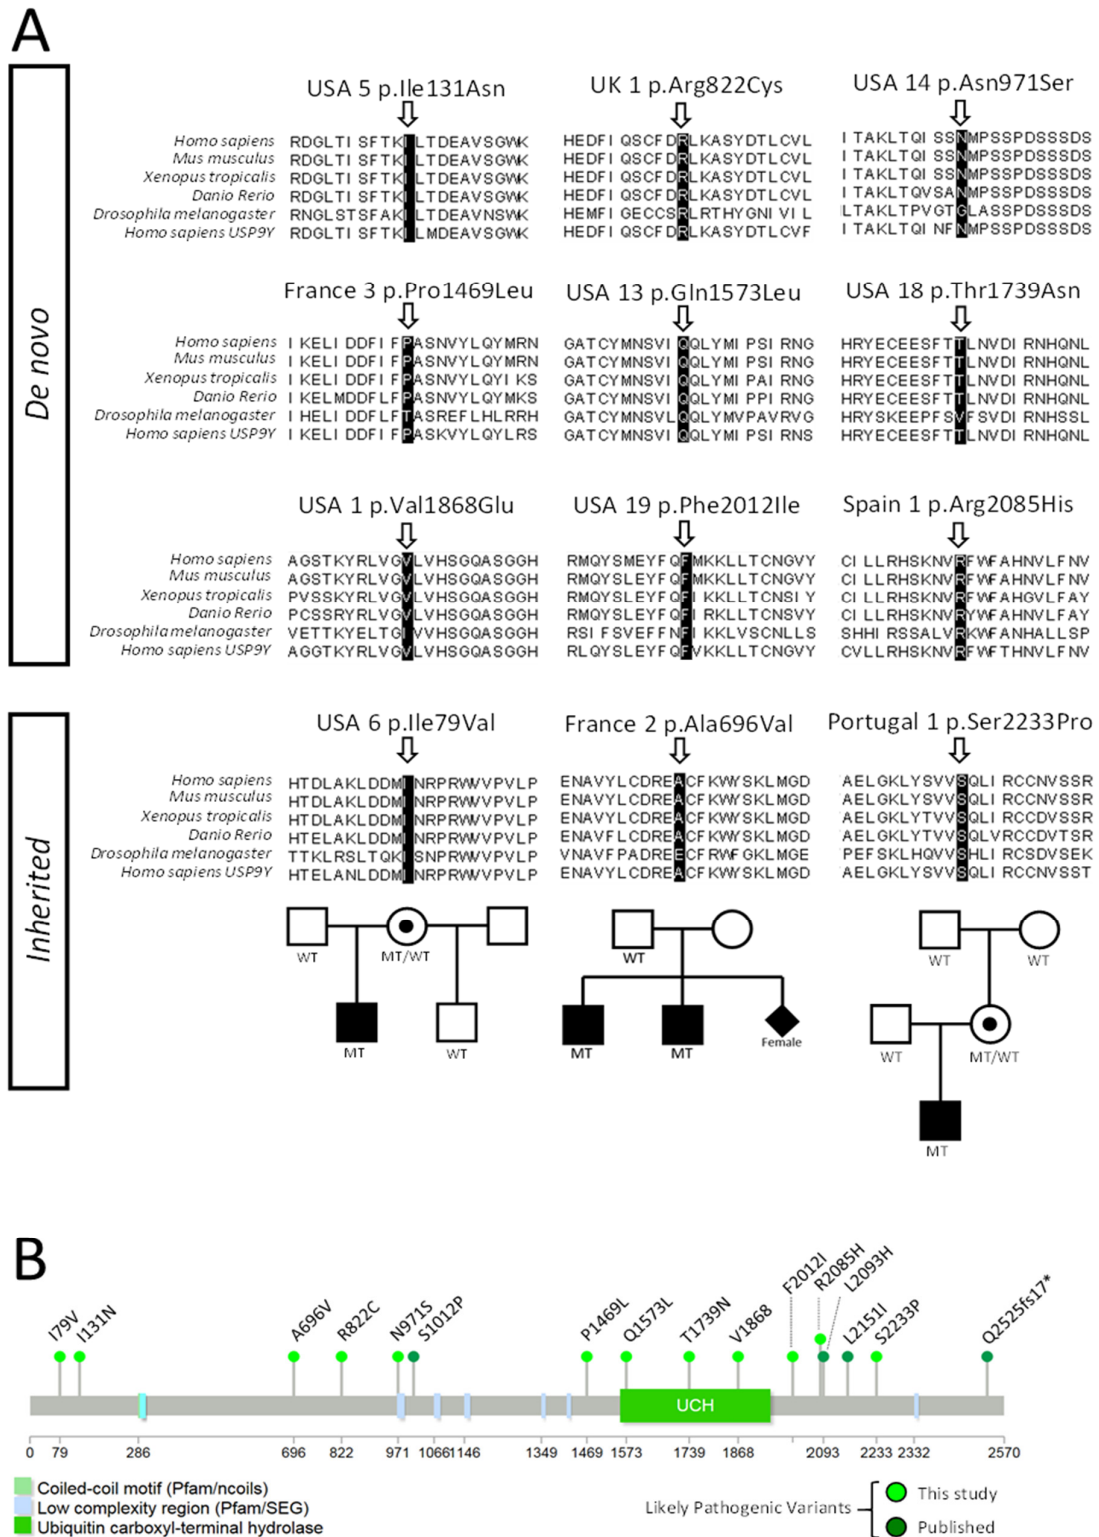



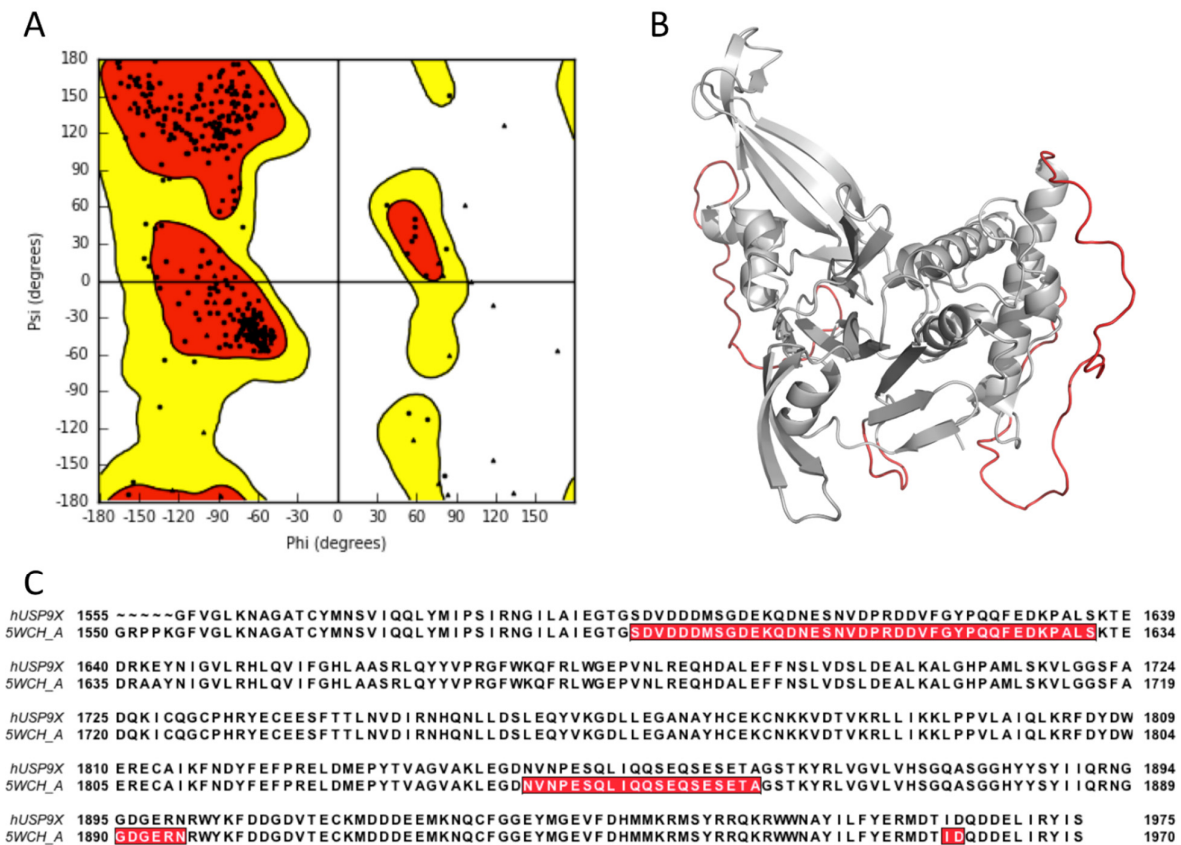

**Figure S3. Ramachandran plot of USP9X catalytic domain homology model.** Human USP9X/1555-1975 was aligned to crystal structure 5WCH using Maestro multiple sequence viewer (Schrödinger). Homology model was generated using Maestro Bioluminate (Schrödinger) using energy minimisation to model flexible loops absent from 5WCH. A. Ramachandran plot of USP9X homology model. Images were prepared using PyMol (Schrödinger). >97% amino acids are within accepted torsion angles. B. Homology model showing regions present within the crystal structure 5WCH (Zhang et al (1), grey), with absent and likely flexible loops modeled by energy minimization (red). C. Alignment showing the primary sequence positions of flexible loops (red) and sequence alignment used for homology modeling.

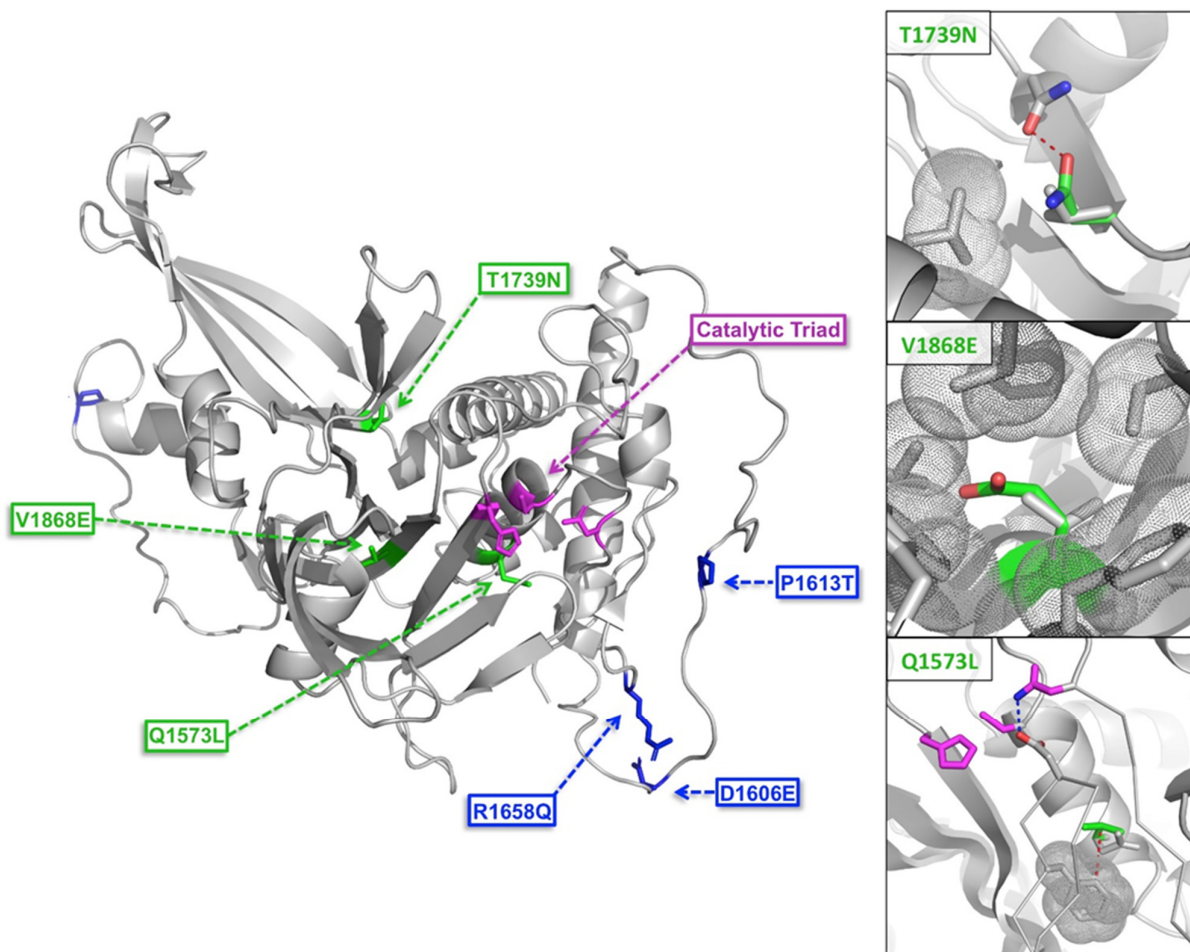

**Figure S4. Structural characterization of USP9X variants located in the catalytic domain.** Homology model of USP9X (grey) with catalytic site (magenta), likely pathogenic variants (green) and variants of unknown significance (blue) indicated. Likely pathogenic variants are positioned in regions of well-ordered secondary structure which are peripheral to the core catalytic site. Variants of unknown significance occur within two loops of predicted (absent from crystal structure) disordered regions, distal to the catalytic site. Variants within this region are less likely to drastically alter protein stability or catalytic activity, but may produce more nuanced alterations in intra/intermolecular interactions. Insets indicate local structural effects of indicated likely pathogenic variants. All native amino acid side chains are represented as grey sticks, with the position of variants / catalytic residues indicated by colored sticks. Charged atoms are indicated in blue (positive) and red (negative). Hydrophobic van der Waals radii are indicated by dots. T1739N may result in charge-charge repulsion with N1741, indicated by a red dashed line, and steric clash with L1687 altering local secondary structure. V1868 lies within a tight hydrophobic core (composed of L1865, W1897, M1916, Y1883, F1818 and C1920). Change of Valine to the bulky, highly polar glutamate is likely to disrupt hydrophobic packing and produce steric clash with adjacent residues, altering local secondary. Q1573 lies upon an alpha helix adjacent to the catalytic site. Glutamate to Leucine substitution may alter hydrophobic packing (with F1900), inducing conformational change within this loop, and potentially altering the position of D1902. This residue forms charge-charge interactions with the catalytic N1561, indicated by a blue dashed line. Alterations in the positioning of D1902 are likely to affect the availability or efficiency of N1561 during proteolytic activity.

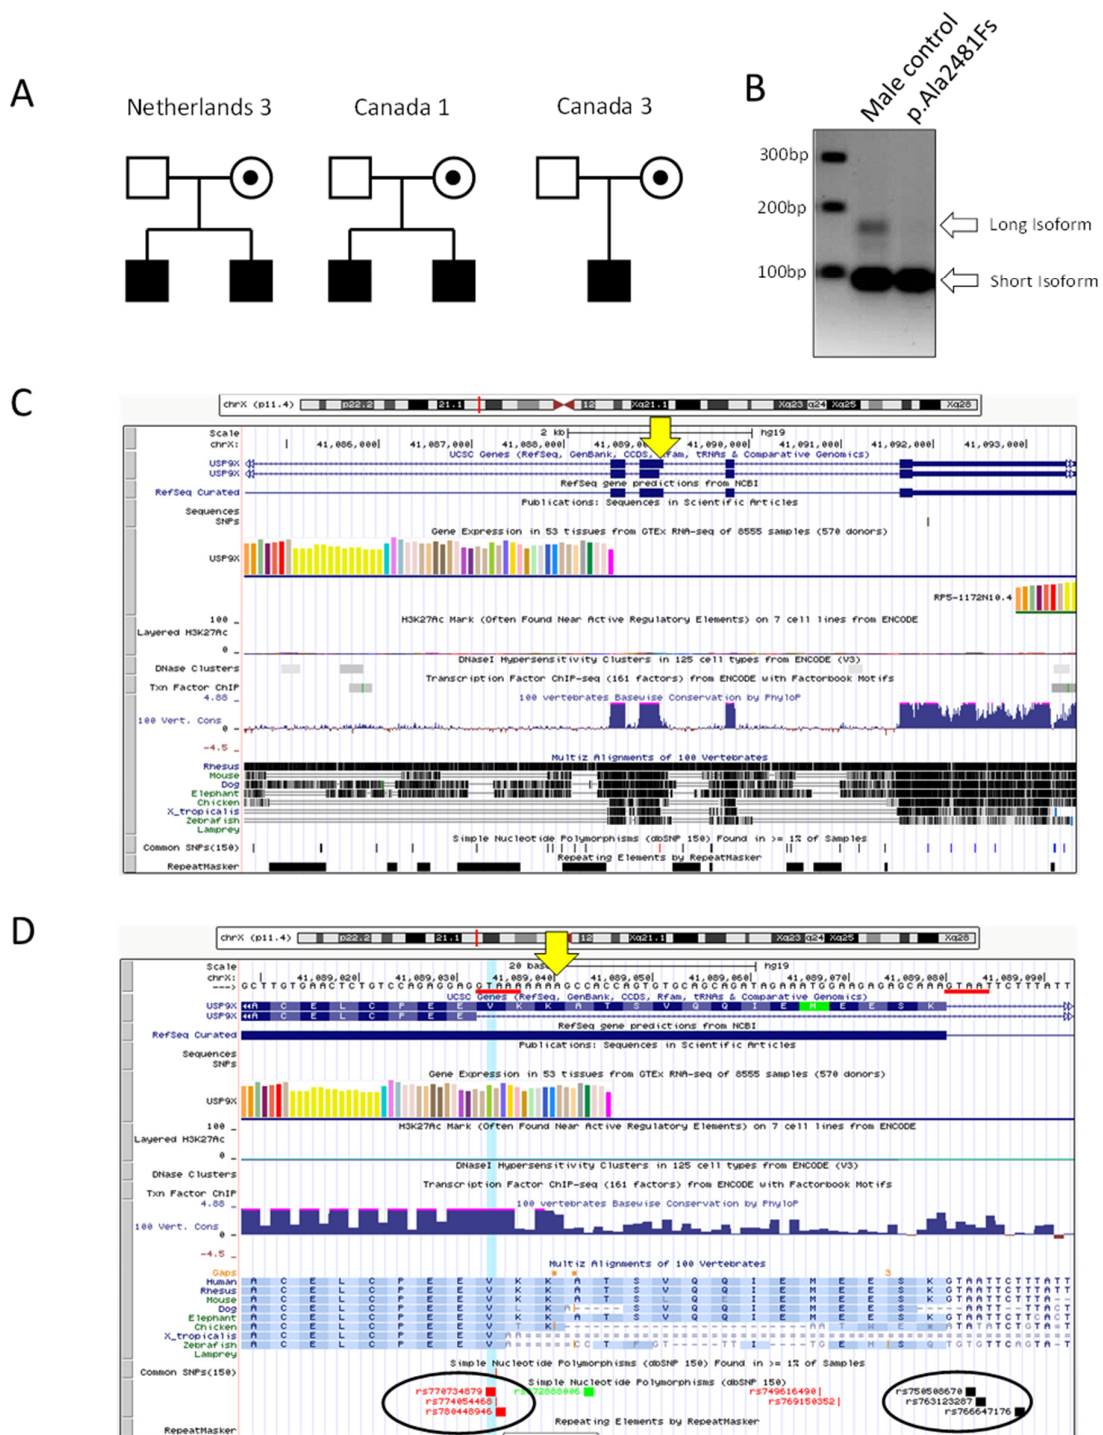

**Figure S5. A recurrent variant with deleterious or benign impact depending on *USP9X* isoform usage.** p.Ala2481Fs\*17 variant impacts the long *USP9X* isoform (NM\_001039590.2:c. c.7440dupA, NP\_001034679.2:p.Ala2481Serfs\*17) but is intronic in the short isoform (NM\_001039591.2;c.[0]. NP\_001034680.2 p.[0]). **A.** Pedigrees of the three independent families with this variant. **B.** Analysis of mRNA species in fibroblast cell lines from control individual and individual with p.Ala2481fs\*17 variant (from family Netherlands 3). Note that long isoform is poorly expressed in control, but absent in the variant cell line (suggestive of non-sense mediated mRNA decay). **C-D.** UCSC Genome Browser views of the relevant genomic region. Yellow arrows represent site of variant (dup A). Red underlines in D represent splice sites. Black circles highlight SNPs in splice sites.

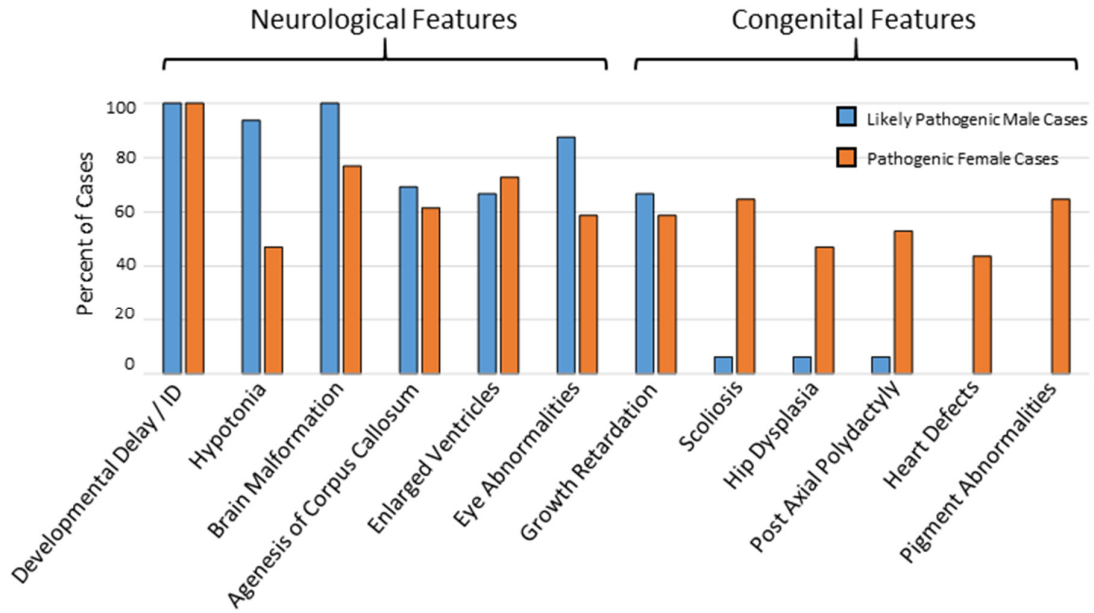

**Figure S6. Comparison of the major neurological and congenital features observed in female subjects with male subjects.** Most frequent features of female subjects with pathogenic heterozygous loss of function mutations as reported in Reijnders *et al* (2). Assessed against the cohort of males with likely pathogenic missense variants. Note the major neurological findings in females are frequently observed in males, but the congenital features are not.

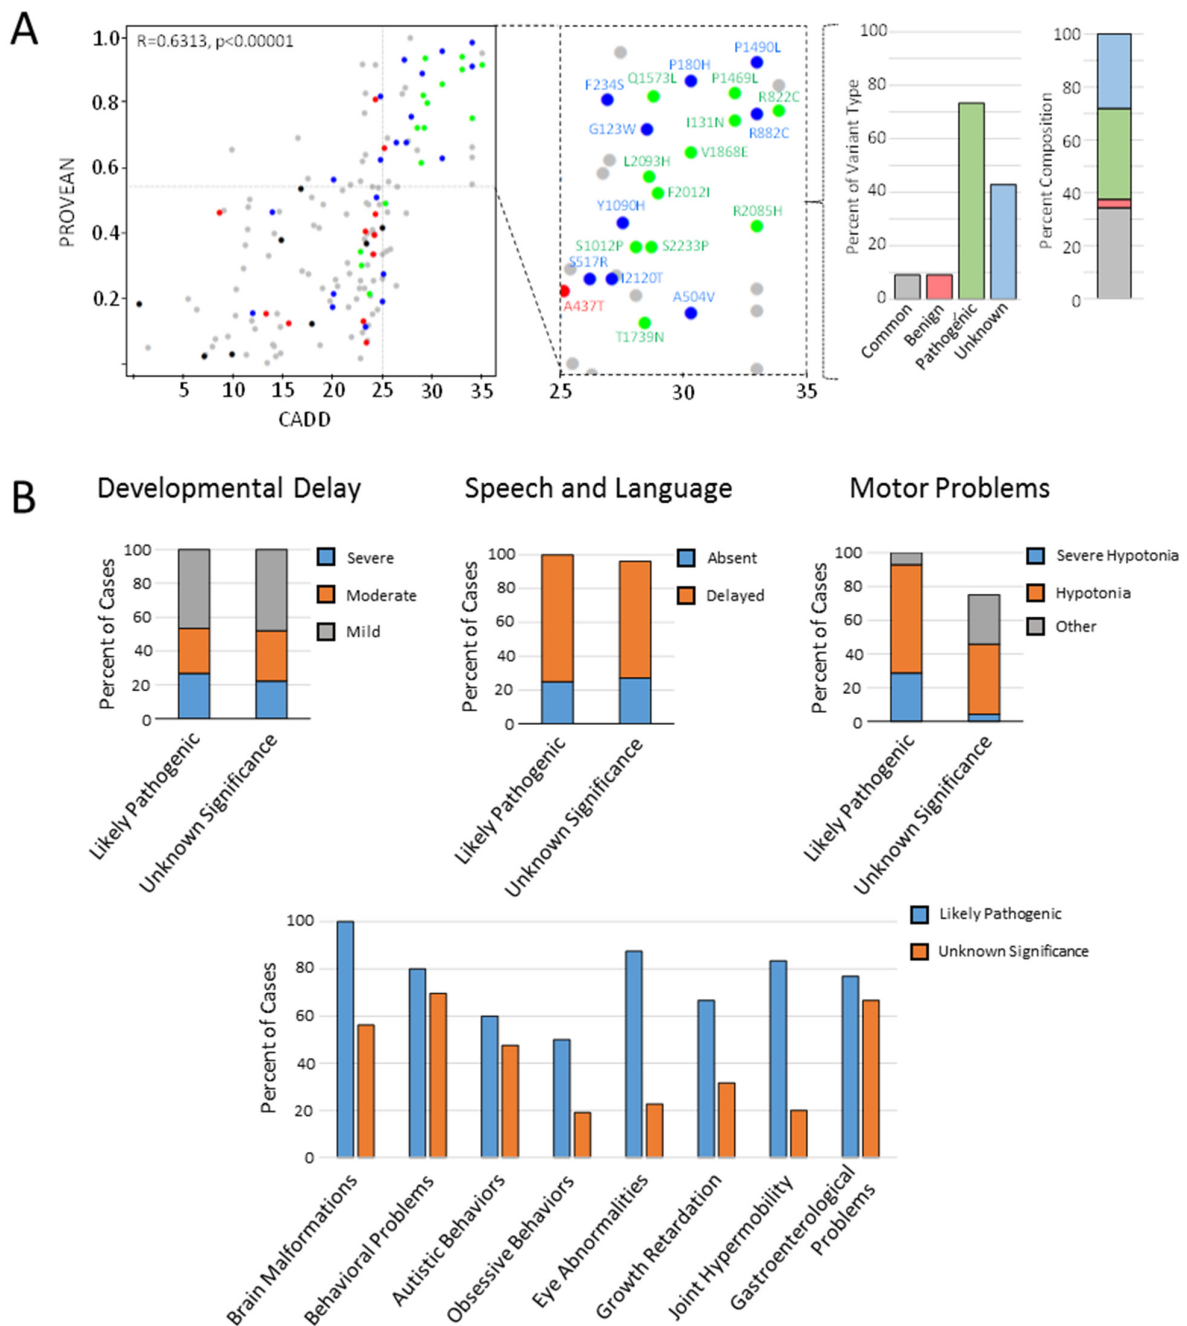

**Figure S7. Comparison variants of unknown significance with likely pathogenic variants.** A. CADD and PROVEAN scores reveal clustering of subsets of variants of unknown significance with likely pathogenic variants in upper-right quadrant consistent with pathogenicity. Scores are significantly correlated (Pearson’s correlation given). Inset identifies variants in the ‘pathogenic quadrant’. Graphs show percent of each type of variant, and the overall composition of variant types within the pathogenic quadrant. B Distinctive clinical features of individuals with USP9X likely pathogenic variants are observed also in many individuals with USP9X variants of unknown significance.



A

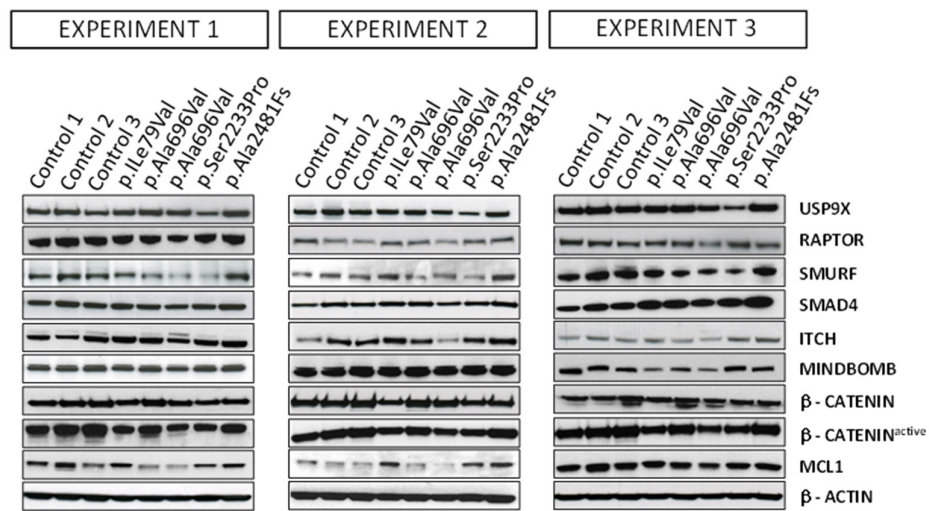

B

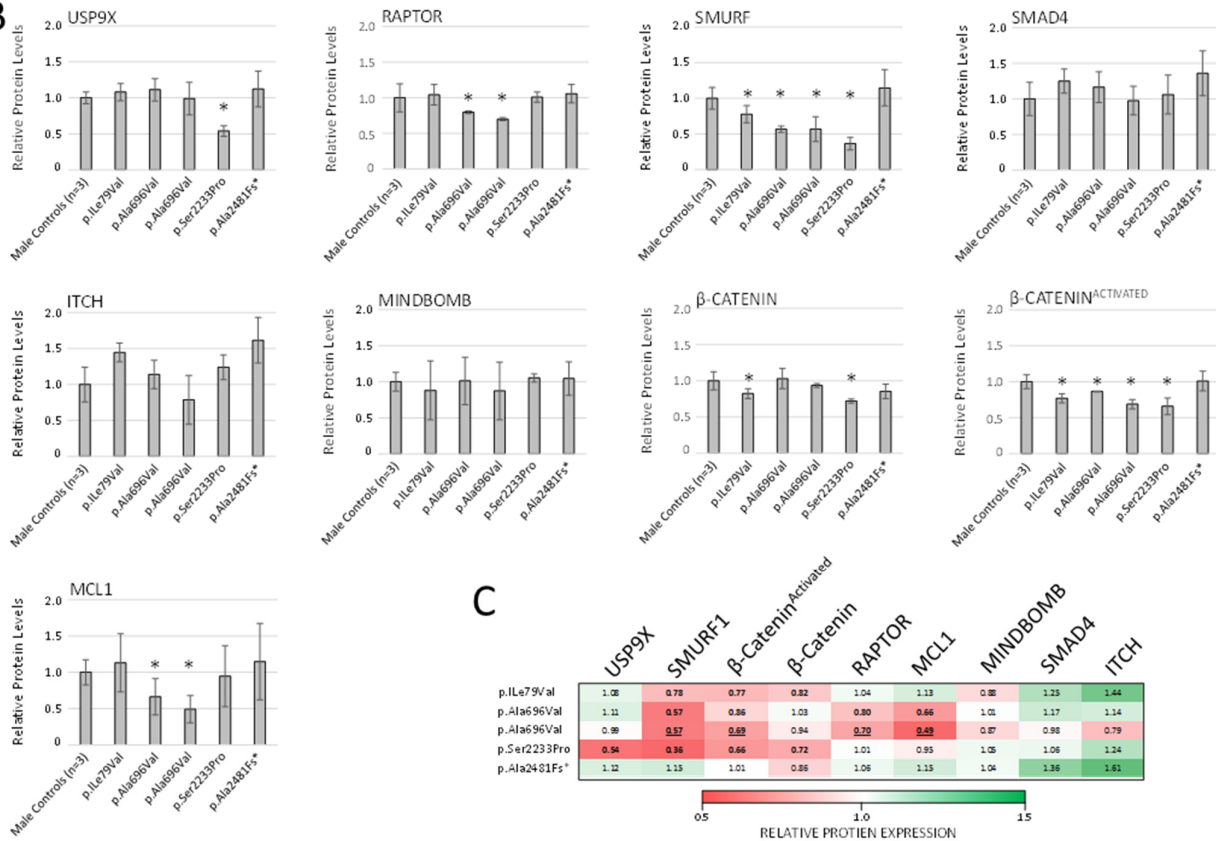

**Figure S8. Protein expression of USP9X and its substrates in fibroblast cell lines derived from individuals with USP9X variants.** A. Western blot analysis of n=3 independent experiments. B-C. Quantitation of western blots in A. \*significantly different to controls, p<0.05 by Student’s t-test. In C, significant values are in bold and underlined.

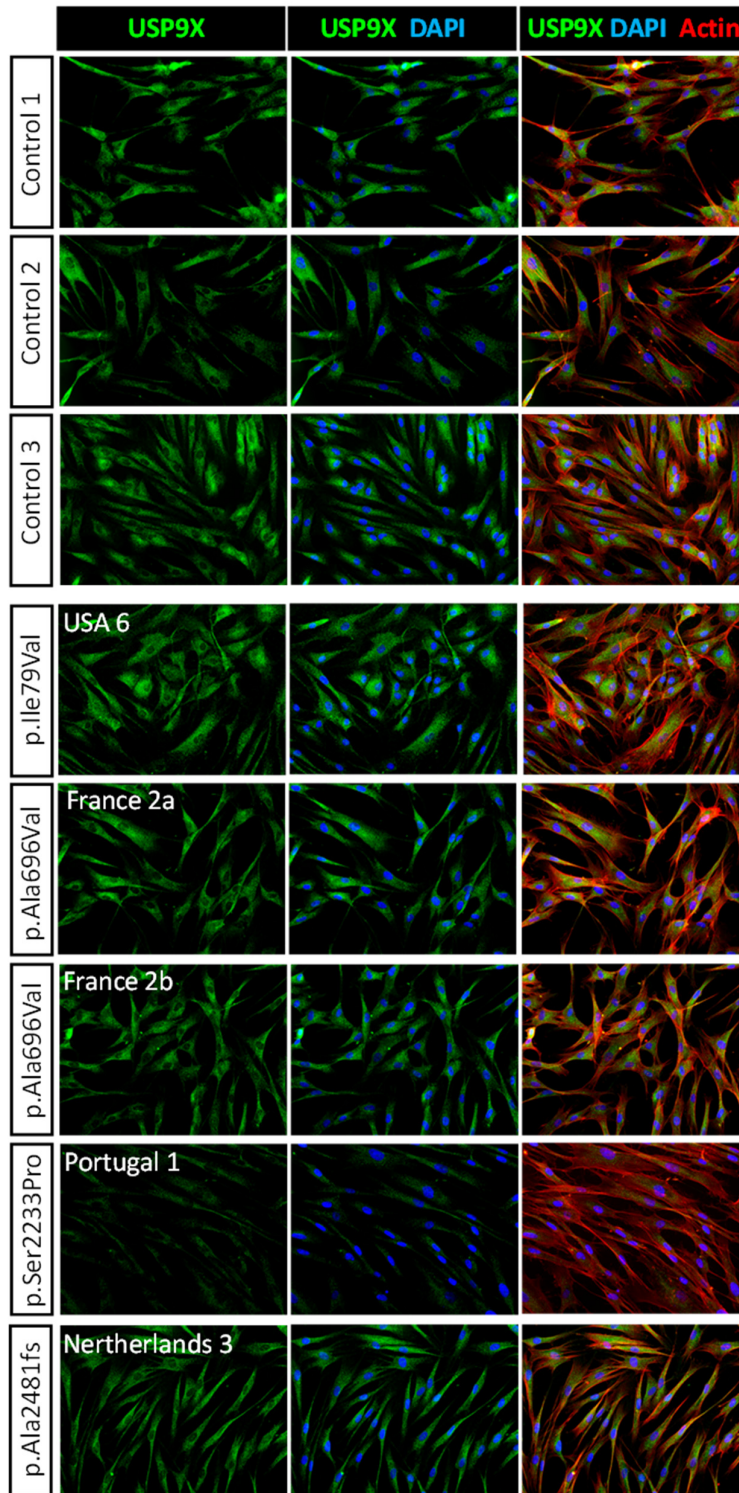

**Figure S9. Representative immunofluorescent images of fibroblast cell lines derived from control individuals, and individuals with USP9X variants.** Cells stained with antibodies against USP9X (Green), and counterstained with DAPI (Nuclei, Blue) and Phalloidin (Filamentous actin cytoskeleton, Red).

A

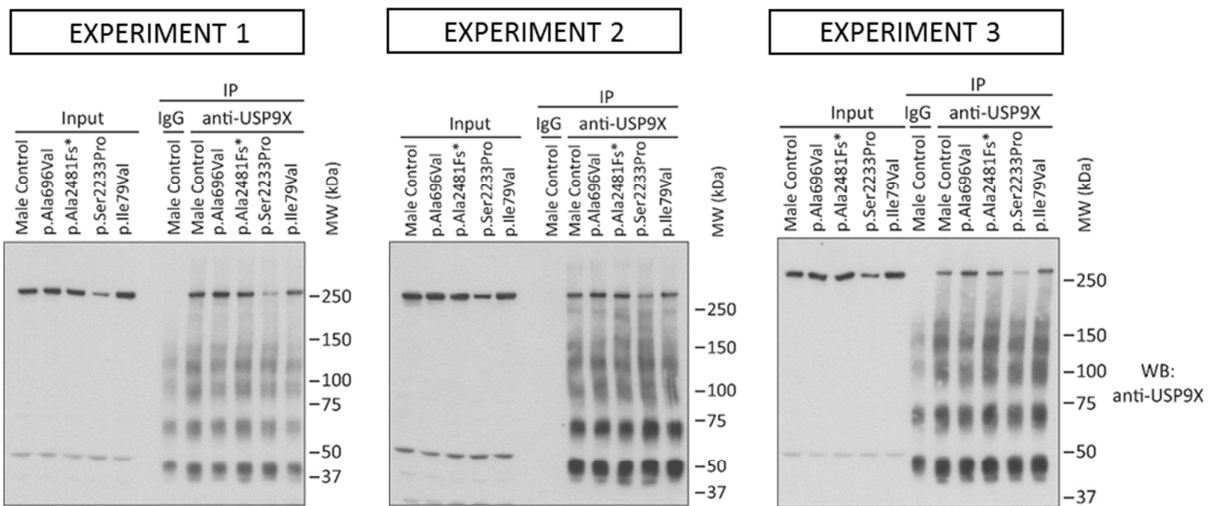

B

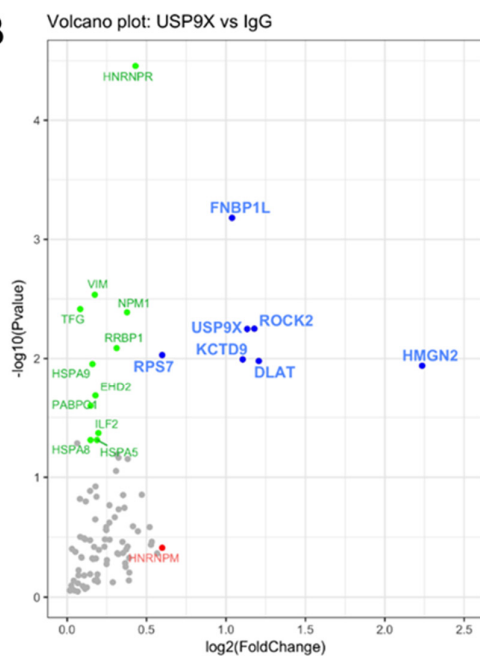

C

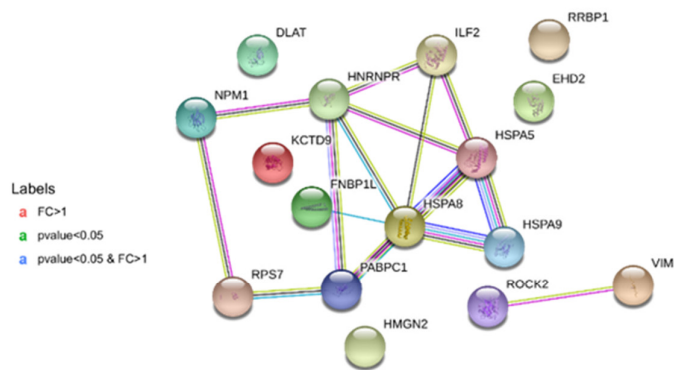

**Figure S10. Identification of USP9X interactors in fibroblast cell lines derived from control individuals and individuals with USP9X variants.** A. Western blot analysis of USP9X immunoprecipitation experiments. IgG immunoprecipitations served as negative control samples in subsequent proteomics. USP9X and IgG control immunoprecipitated samples from each experiment subsequently analysed using TMT-EIS-MS/MS identification and quantification. B. Volcano plot of proteins immunoprecipitated with USP9X from control fibroblasts. Results derived from 3 independent immunoprecipitation experiments in A. Fold change and statistical values represents comparison to proteins immunoprecipitated with control IgG. p values derived from adjusted Students paired t-test. C. STRING analysis of significantly enriched proteins in B. Statistical analysis reveals a well-connected network (Protein-Protein Interaction enrichment p-value: 0.000589).



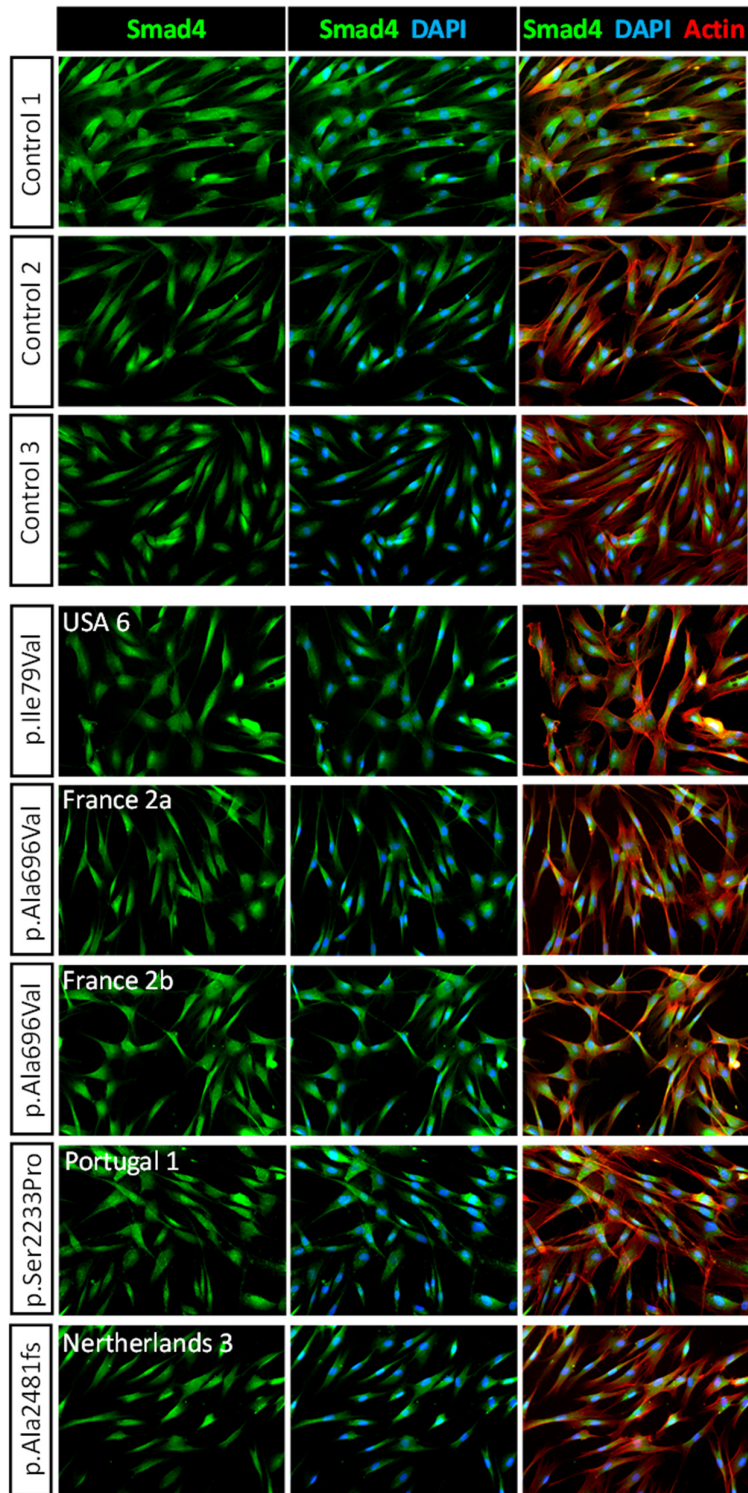

**Figure S11. Expression and localisation of SMAD4 in fibroblast cell lines derived from control individuals, and individuals with USP9X variants.** Representative immunofluorescent images. Cells stained with antibodies against SMAD4 (Green), and counterstained with DAPI (Nuclei, Blue) and Phalloidin (Filamentous actin cytoskeleton, Red).

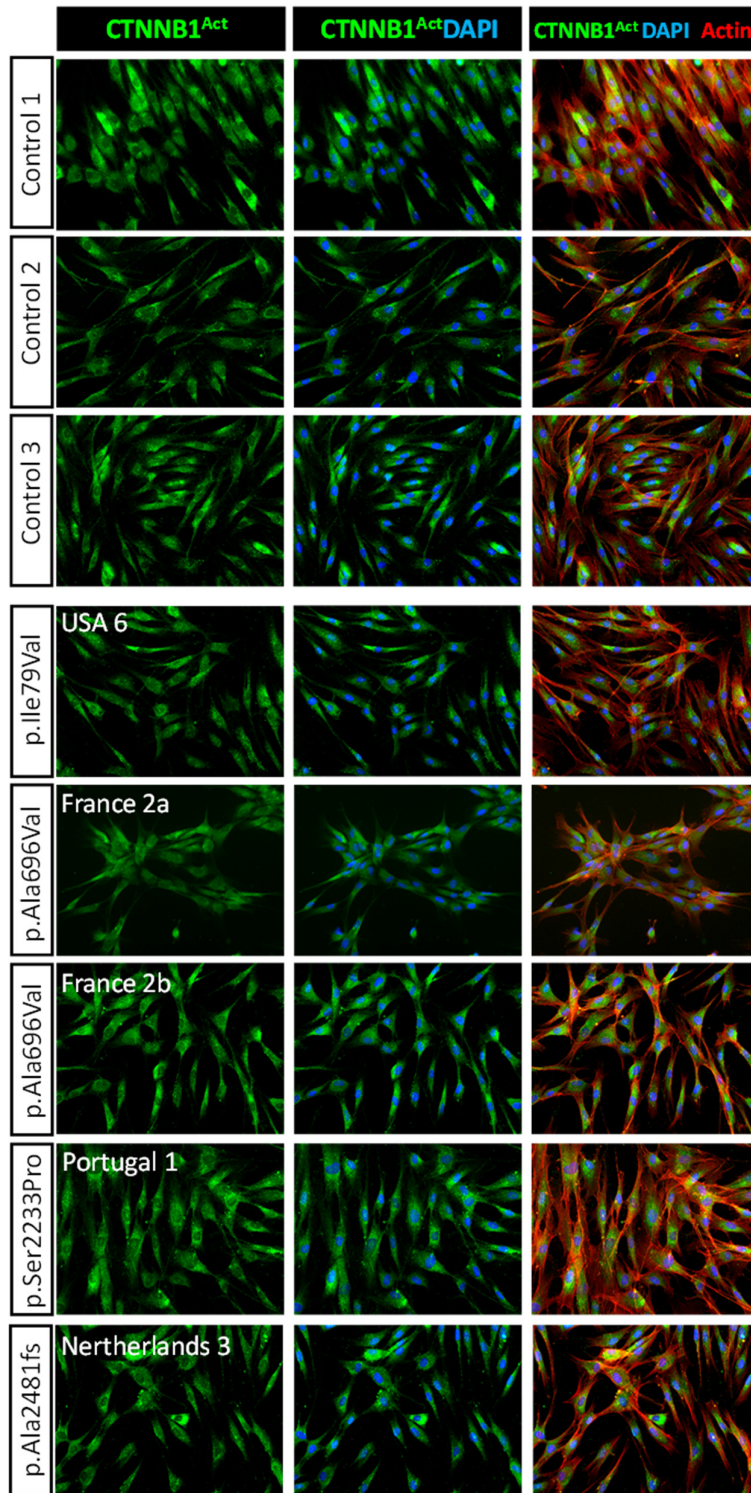

**Figure S12. Expression and localisation of CTNNB1 in fibroblast cell lines derived from control individuals, and individuals with USP9X variants.** Representative immunofluorescent images. Cells stained with antibodies against activated CTNNB1 (aka  $\beta$ -catenin, Green), and counterstained with DAPI (Nuclei, Blue) and Phalloidin (Filamentous actin cytoskeleton, Red).

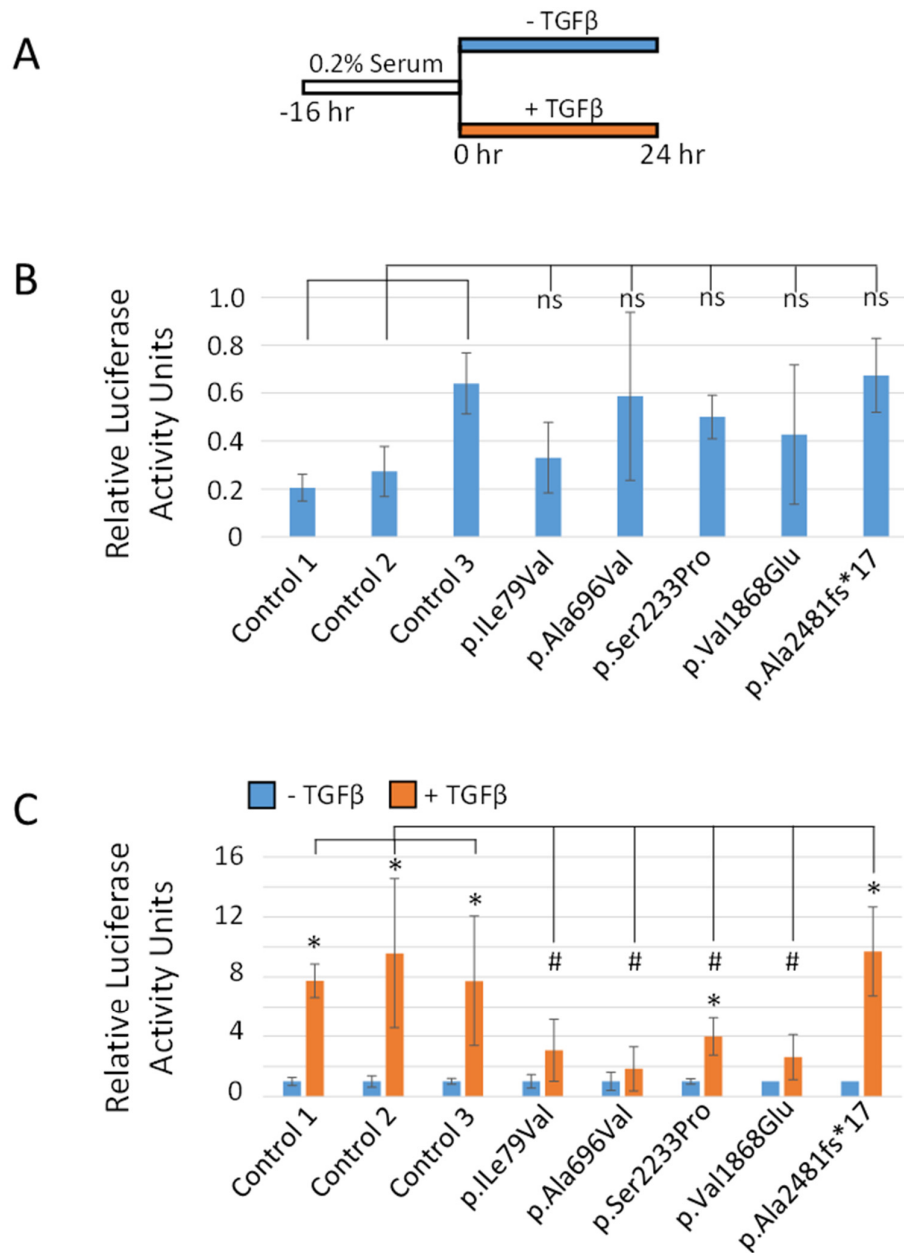

**Figure S13. USP9X variants disrupt TGFβ signalling in fibroblast cell line derived from individuals with USP9X variants.** A. Pictorial view of the experimental approach. Cells were first serum starved (0.2% serum) for 16 hrs prior to addition of TGFβ and assayed 24 hours later. A. In the absence of added TGFβ, cells display similar basal levels of signalling as assessed by TGFβ luciferase reporter assay. B. Relative increase of TGFβ signalling following addition of ligand as assessed by TGFβ luciferase reporter assays. Experiment done in quadruplicate. \* statistical difference between +/- TGFβ. # statistical difference between controls and USP9X variant cell lines. \*#p<0.05 Student's t-test. N.B. p.Ala2481fs\*17 variant effects only the long USP9X isoform which is barely expressed in fibroblasts.



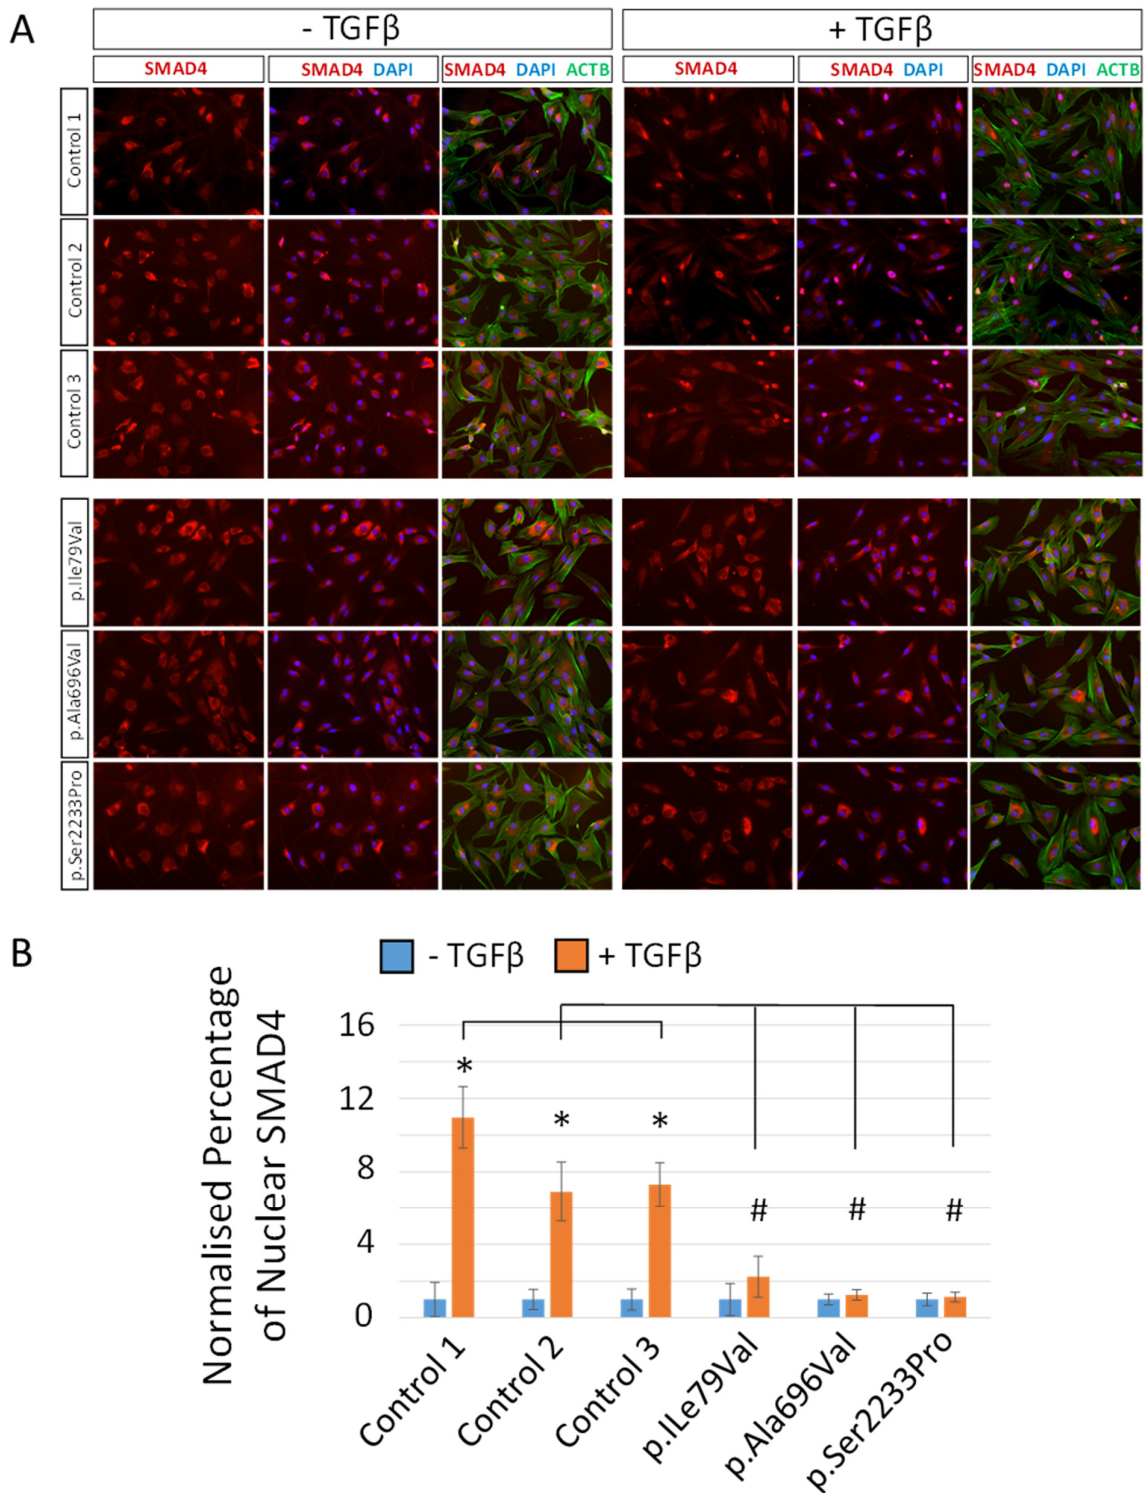

**Figure S14. SMAD4 nuclear enrichment is deficient in fibroblast cell lines derived from individuals with USP9X variants in response to TGF $\beta$  stimulation.** A. Representative immunofluorescent images of SMAD4 localisation before (time = 0 hr) and after (time = 24 hours) addition of TGF $\beta$ . Cells stained with antibodies against SMAD4 (Red), and counterstained with DAPI (Nuclei, Blue) and Phalloidin (Filamentous actin cytoskeleton, Green). B. Quantitation of SMAD4 enriched nuclei following addition of TGF $\beta$ . \* statistical difference between +/- TGF $\beta$ . # statistical difference between controls and USP9X variant cell lines.  $p < 0.05$  Student's t-test;  $n = 5$  replicates.

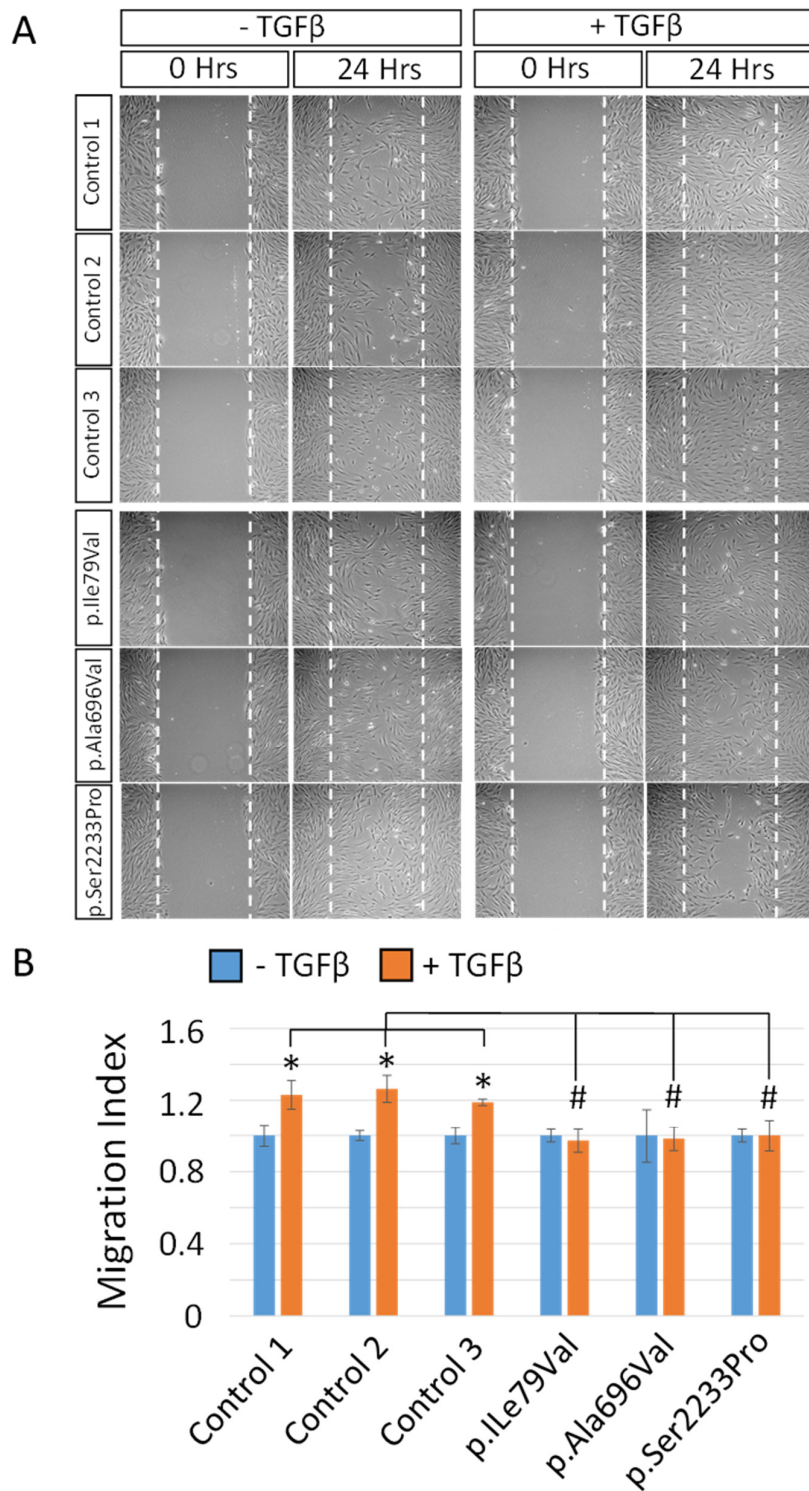

**Figure S15. TGF $\beta$ -stimulated cell migration is defective in fibroblast cell lines derived from individuals with USP9X variants.** A. Representative phase-contrast images of scratch migration assays. B. Quantitation of TGF $\beta$ -stimulated migration of cells into the scratch area. n=9 replicates (3 biological x 3 technical (scratches) analysed). \* statistical difference between +/- TGF $\beta$ . # statistical difference between controls and USP9X variant cell lines. ## p<0.05 Student's t-test.

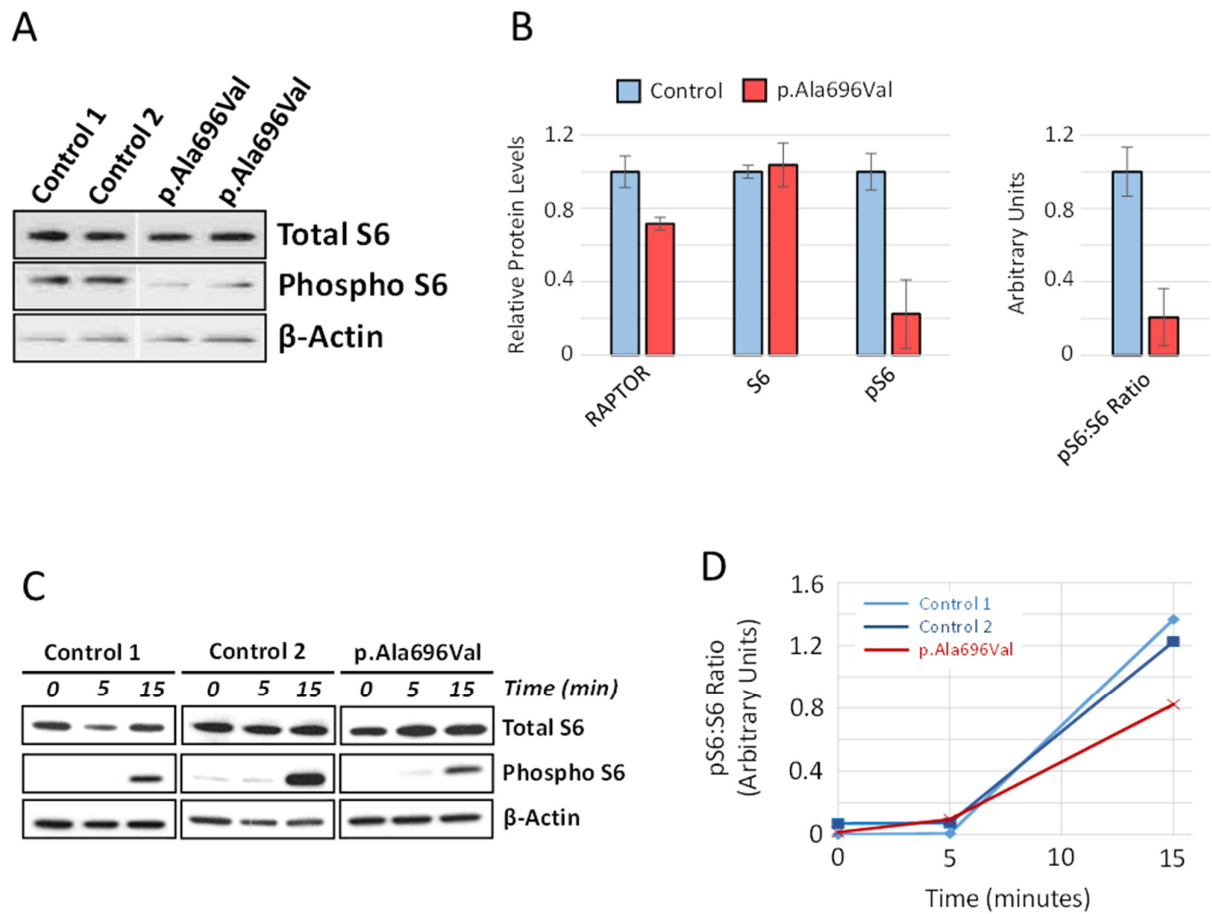

**Figure S16. Fibroblast cell lines harbouring p.Ala696Val variant show defective mTOR signalling.** A-B. Cells grown in presence of 10% foetal calf serum and protein harvested for analysis. A. Western-blot analysis of control and p.Ala696Val cell lines (from 2 unique individuals, brothers). B. Quantification of blots in A and calculation of ratio of phosphorylated S6 (pS6) to total S6 levels. Loss of pS6:S6 ratio indicates loss of mTOR signalling. C-D. Cells grown for 16 hours in absence of serum. Serum was returned and protein lysates collected over 15 minute time course. C. Western blot analysis showing kinetics of pS6 induction. D. Quantitation of western-blots in C.

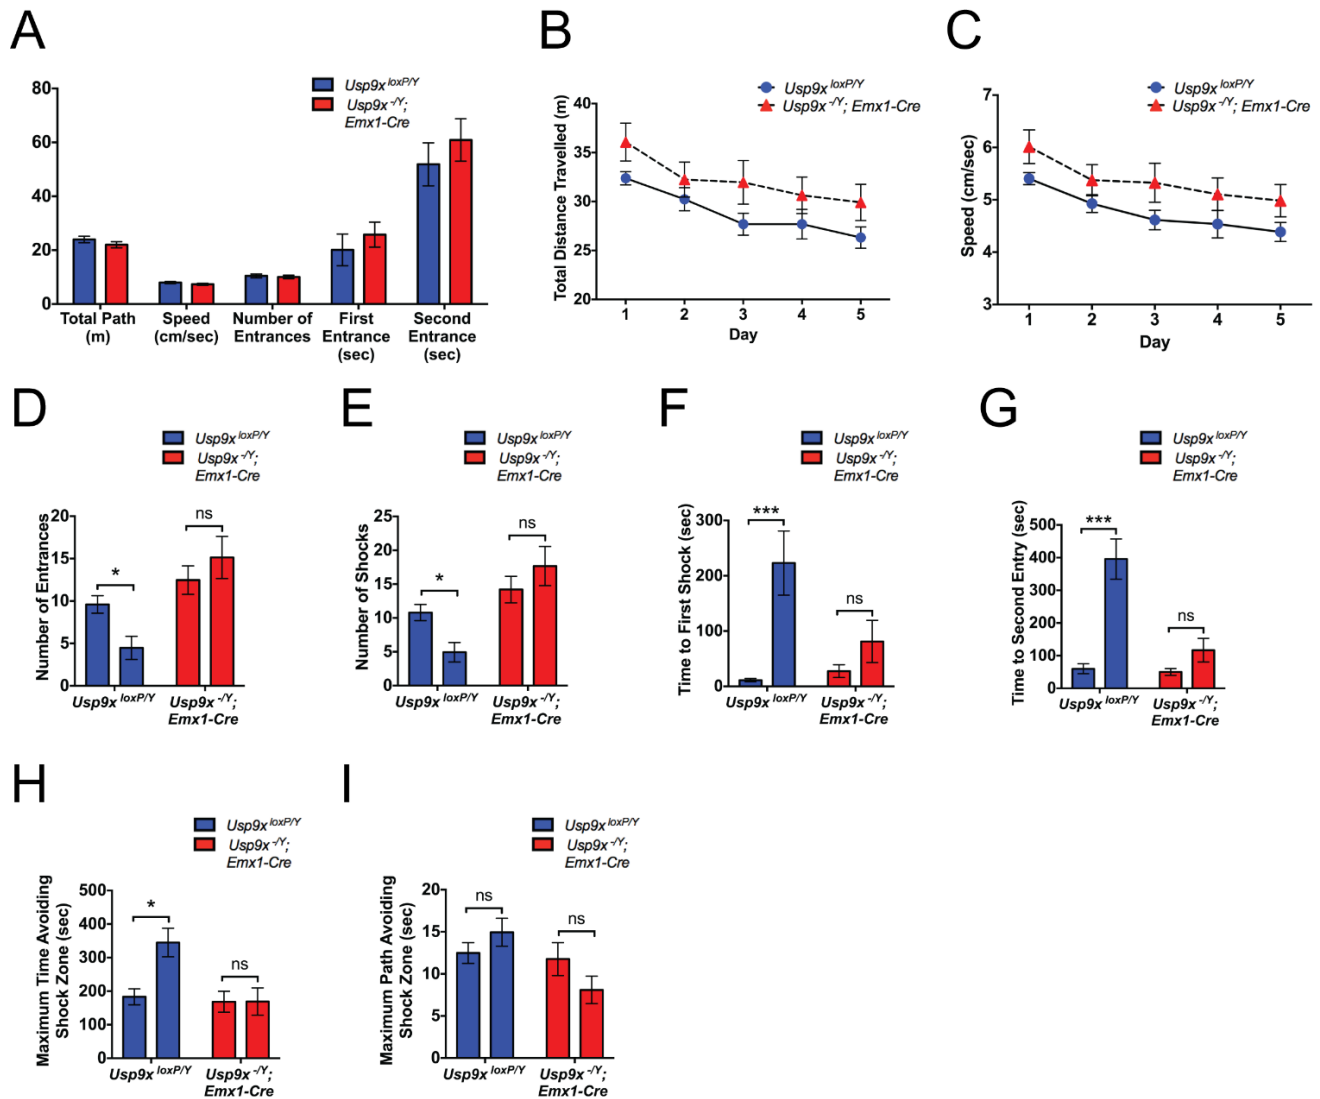

**Figure S17.** A. *Usp9x* knockout mice do not show altered locomotory behaviour within the APA test arena, and do not learn within the APA task. A. Analysis of mouse movement patterns within the habituation phase of the APA test revealed no significant difference between wild-type (blue bars) and *Usp9x* knockout (red bars) mice. Similarly, there were no significant differences in the total distance travelled (B) and speed (C) between control and knockout animals over the five days of the APA protocol. D-I. Intra-genotype analysis revealed that, whereas wild-type mice performed better on day 5 than day 1, indicative of learning within the APA task, knockout mice did not perform better on day 5 versus day 1 of the task. \*  $p < 0.05$ ; \*\*\*  $p < 0.001$ , two way ANOVA.

# **SUPPLEMENTAL TABLES S1-S7**



|                      | Family         | Subjects     | Variant Details |                |                | Platform | Segg#   | Number and Frequency in gnomAD |          |           | Prediction Algorithms |       |         |       |      |       |  |  |
|----------------------|----------------|--------------|-----------------|----------------|----------------|----------|---------|--------------------------------|----------|-----------|-----------------------|-------|---------|-------|------|-------|--|--|
|                      |                |              | ChromosomeX     | cDNA           | Protein        |          |         | Het                            | Hem      | Frequency | Polyphen2             |       | PROVEAN |       | CADD |       |  |  |
|                      |                |              |                 |                |                |          |         |                                |          |           | Score                 | Pred  | Score   | Pred  |      | Score |  |  |
|                      |                |              | GRCh37(hg19)    | NM_001039590.2 | NP_001034679.2 |          |         |                                |          |           |                       |       |         |       |      |       |  |  |
| Likely Pathogenic    | USA 6          | 1            | 40988391A>G     | c.235A>G       | p.Ile79Val     | tWES     | Yes     |                                |          |           |                       | 0.837 | P       | -0.77 | N    | 23.7  |  |  |
|                      | USA 5          | 1            | 40994047T>A     | c.392T>A       | p.Ile131Asn    | WES      | De novo |                                |          |           |                       | 0.999 | D       | -6.13 | D    | 33    |  |  |
|                      | France 2       | 2            | 41025226C>T     | c.2087C>T      | p.Ala696Val    | WES      | n/a     |                                |          |           |                       | 0.287 | B       | -2.18 | N    | 25.3  |  |  |
|                      | UK1            | 1            | 41027299C>T     | c.2464C>T      | p.Arg822Cys    | tWES     | De novo |                                |          |           |                       | 0.991 | D       | -6.47 | D    | 35    |  |  |
|                      | USA 14         | 1            | 41029757A>G     | c.2912A>G      | p.Asn971Ser    | tWES     | De novo |                                |          |           |                       | 0.999 | D       | -6.99 | D    | 29.3  |  |  |
|                      | France 3       | 1            | 41057806C>T     | c.4406C>T      | p.Pro1469Leu   | tWES     | De novo |                                |          |           |                       | 0.963 | D       | -7.13 | D    | 33    |  |  |
|                      | USA 13         | 1            | 41060427A>T     | c.4718A>T      | p.Gln1573Leu   | tWES     | De novo |                                |          |           |                       | 0.102 | B       | -1.39 | N    | 22.8  |  |  |
|                      | USA 18         | 1            | 41073847C>A     | c.5216C>A      | p.Thr1739Asn   | tWES     | De novo |                                |          |           |                       | 0.83  | P       | -2.95 | D    | 28.9  |  |  |
|                      | USA 1          | 1            | 41075423T>A     | c.5603T>A      | p.Val1868Glu   | tWES     | De novo |                                |          |           |                       | 0.732 | P       | -5.48 | D    | 31    |  |  |
|                      | USA 19         | 1            | 41075854T>A     | c.6034T>A      | p.Phe2012Ile   | tWES     | De novo |                                |          |           |                       | 0.961 | D       | -4.71 | D    | 29.5  |  |  |
| Spain 1              | 1              | 41077669G>A  | c.6254G>A       | p.Arg2085His   | tWES           | De novo  |         |                                |          |           | 0.974                 | D     | -4.14   | D     | 34   |       |  |  |
| Portugal 1           | 1              | 41082601T>C  | c.6697T>C       | p.Ser2233Pro   | DES            | Yes      |         |                                |          |           | 0.918                 | D     | -3.85   | D     | 29.2 |       |  |  |
| Unknown Significance | USA 7          | 1            | 40994022G>T     | c.367G>T       | p.Gly123Trp    | tWES     | n/a     |                                |          |           |                       | 0.996 | D       | -6.18 | D    | 32    |  |  |
|                      | Netherlands 11 | 2            | 40996160C>A     | c.539C>A       | p.Pro180His    | tWES     | Yes     |                                |          |           |                       | 0.999 | D       | -7.76 | D    | 31    |  |  |
|                      | USA 9          | 1            | 4099955T>C      | c.701T>C       | p.Phe234Ser    | tWES     | n/a     |                                |          |           |                       | 0.999 | D       | -6.86 | D    | 27.2  |  |  |
|                      | USA 3          | 1            | 41000406A>G     | c.958A>G       | p.Arg320Gly    | WES      | n/a     |                                |          |           |                       | 0.903 | P       | -4.95 | D    | 24.8  |  |  |
|                      | Netherlands 9  | 1            | 41007713C>T     | c.1511C>T      | p.Ala504Val    | tWES     | Yes     |                                |          |           |                       | 0.955 | D       | -3.05 | D    | 31    |  |  |
|                      | Netherlands 12 | 1            | 41007751A>C     | c.1549A>C      | p.Ser517Arg    | tWES     | Yes     |                                |          |           |                       | 0.982 | D       | -3.46 | D    | 26.4  |  |  |
|                      | USA 12         | 2            | 41029255C>T     | c.2644 C>T     | p.Arg882Cys    | tWES     | Yes     |                                |          |           |                       | 1     | D       | -6.37 | D    | 34    |  |  |
|                      | Canada 2       | 1            | 41029345A>G     | c.2734A>G      | p.Ile912Val    | tWES     | n/a     | 1                              | 0        | 5.60E-06  |                       | 0.001 | B       | -0.49 | N    | 11.99 |  |  |
|                      | Netherlands 10 | 1            | 41043278C>A     | c.3176C>A      | p.Ala1059Asp   | tWES     | Yes     |                                |          |           |                       | 0.186 | B       | -1.05 | N    | 25.1  |  |  |
|                      | Netherlands 1  | 1            | 41043370T>C     | c.3268T>C      | p.Tyr1090His   | tWES     | Yes     |                                |          |           |                       | 0.999 | D       | -4.2  | D    | 27.9  |  |  |
|                      | Netherlands 7  | 1            | 41045786A>G     | c.3575A>G      | p.His1192Arg   | tWES     | n/a     |                                |          |           |                       | 0.039 | B       | -2.02 | N    | 13.96 |  |  |
|                      | USA 21         | 1            | 41045833C>T     | c.3622 C>T     | p.Pro1208Ser   | tWES     | n/a     |                                |          |           |                       | 0.05  | B       | -3.01 | D    | 24.8  |  |  |
|                      | USA 11         | 1            | 41048705C>G     | c.3954C>G      | p.Asp1318Glu   | tWES     | Yes     |                                |          |           |                       | 0.083 | B       | -2.63 | D    | 20.1  |  |  |
|                      | USA 22         | 1            | 41057869C>T     | c.4469C>T      | p.Pro1490Leu   | tWES     | n/a     |                                |          |           |                       | 0.973 | D       | -9.26 | D    | 34    |  |  |
|                      | Spain 2        | 1            | 41060527C>A     | c.4818C>A      | p.Asp1606Glu   | tWGS     | n/a     |                                |          |           |                       | 0.003 | B       | -0.58 | N    | 20    |  |  |
|                      | USA 17         | 1            | 41064568C>A     | c.4837C>A      | p.Pro1613Tyr   | tWES     | n/a     |                                |          |           |                       | 0.014 | B       | -0.66 | N    | 25    |  |  |
|                      | USA 26         | 2            | 41064704G>A     | c.4973G>A      | p.Arg1658Gln   | tWES     | Yes     | 3                              | 2        | 1.70E-05  |                       | 0.004 | B       | -0.27 | N    | 23.3  |  |  |
|                      | Canada 6       | 1            | 4107774T>C      | c.6359T>C      | p.Ile2120Thr   | WES      | n/a     | 1                              | 0        | 5.59E-06  |                       | 0.474 | P       | -3.46 | D    | 27.4  |  |  |
| USA 28               | 1              | 41084144A>C  | c.6901A>C       | p.Lys2301Gln   | tWGS           | n/a      |         |                                |          |           | 0.36                  | B     | -2.29   | N     | 24.4 |       |  |  |
| Netherlands 3        | 2              | 41089041dupA | c.7440dupA      | p.Ala2481fs*17 | WES            | Yes      | 7       | 4                              | 6.21E-05 |           | n/a                   | n/a   | n/a     | n/a   | n/a  |       |  |  |
| Canada 1             | 1              | 41089041dupA | c.7440dupA      | p.Ala2481fs*17 | DES            | Yes      | 7       | 4                              | 6.21E-05 |           | n/a                   | n/a   | n/a     | n/a   | n/a  |       |  |  |
| Canada 3             | 2              | 41089041dupA | c.7440dupA      | p.Ala2481fs*17 | tWES           | n/a      | 7       | 4                              | 6.21E-05 |           | n/a                   | n/a   | n/a     | n/a   | n/a  |       |  |  |
| Netherlands 5        | 1              | 41091697C>T  | c.7633C>T       | p.Pro2545Ser   | WES            | n/a      | 0       | 1                              | 5.60E-06 |           | 0.986                 | D     | -0.7    | N     | 20.1 |       |  |  |
| Likely Benign        | Netherlands 2  | 1            | 41006604G>C     | c.1081G>C      | p.Val361Leu    | WES      | No      |                                |          |           |                       | 0.739 | P       | -1.99 | N    | 24.3  |  |  |
|                      | Netherlands 6  | 1            | 41002691G>A     | c.1309G>A      | p.Ala437Thr    | WES      | No      |                                |          |           |                       | 0.69  | P       | -3.32 | D    | 25.2  |  |  |
|                      | Swiss 1        | 1            | 41031160A>G     | c.3097A>G      | p.Met1033Val   | WES      | No      |                                |          |           |                       | 0.001 | B       | -0.48 | N    | 13.33 |  |  |
|                      | Norway 1       | 1            | 41043275G>A     | c.3173G>A      | p.Arg1058Lys   | tDES     | No      |                                |          |           |                       | 0.002 | B       | 0.02  | N    | 23.4  |  |  |
|                      | Canada 5       | 1            | 41043684C>A     | c.3314C>A      | p.Pro1105His   | WES      | No      |                                |          |           |                       | 0.906 | P       | -4.83 | D    | 24.3  |  |  |
|                      | Netherlands 4  | 1            | 41043792T>C     | c.3422T>C      | p.Met1141Thr   | WES      | No      | 1                              | 1        | 1.12E-05  |                       | 0.001 | B       | -2.01 | N    | 8.661 |  |  |
|                      | Netherlands 8  | 1            | 41055921A>G     | c.4163A>G      | p.Asn1388Ser   | tWES     | n/a     | 16                             | 4        | 1.03E-04  |                       | 0.013 | B       | -0.36 | N    | 23.1  |  |  |
|                      | Belgium 1      | 1            | 41064560A>G     | c.4829A>G      | p.Asn1610Ser   | DES      | n/a     |                                |          |           |                       | 0.137 | B       | -1.71 | N    | 23.3  |  |  |
|                      | France 1       | 1            | 41075489G>A     | c.5669G>A      | p.Gly1890Glu   | tWES     | No      | 2                              | 0        | 1.12E-05  |                       | 0.002 | B       | -0.33 | N    | 15.6  |  |  |
|                      | USA 4          | 1            | 41075489G>A     | c.5669G>A      | p.Gly1890Glu   | WES      | No*     | 2                              | 0        | 1.12E-05  |                       | 0.002 | B       | -0.33 | N    | 15.6  |  |  |
|                      | USA 29         | 1            | 41077775A>G     | c.6360A>G      | p.Ile2120Met   | tWES     | No*     | 17                             | 6        | 1.15E-04  |                       | 0.754 | P       | -1.65 | N    | 24.2  |  |  |
|                      | Germany 1      | 1            | 41077775A>G     | c.6360A>G      | p.Ile2120Met   | WES      | No      | 17                             | 6        | 1.15E-04  |                       | 0.754 | P       | -1.65 | N    | 24.2  |  |  |
| Denmark 1            | 1              | 41082482A>G  | c.6578A>G       | p.Lys2193Arg   | WES            | No       |         |                                |          |           | 0.078                 | B     | -1.35   | N     | 24.1 |       |  |  |
| Reported             | Paemka 1       | 1            | 41031097T>C     | c.3034T>C      | p.Ser1012Pro   | WES      | De novo |                                |          |           |                       | 0.943 | D       | -3.84 | D    | 28.5  |  |  |
|                      | Homan 1        | 1            | 41077693T>A     | c.6278T>A      | p.Leu2093His   | XES      | De novo |                                |          |           |                       | 0.984 | D       | -4.99 | D    | 29.1  |  |  |
|                      | Homan 2        | 2            | 41078388C>A     | c.6469C>A      | p.Leu2157Ile   | XES      | n/a     | 1                              | 0        | 5.68E-06  |                       | 0.245 | B       | -1.18 | N    | 22.9  |  |  |
|                      | Homan 3        | 3            | 41089848delA    | c.7574delA     | p.Gln2525fs*18 | XES      | Yes     |                                |          |           |                       | n/a   | n/a     | n/a   | n/a  | n/a   |  |  |

**Table S1. USP9X variants associated with NDDs.** Likelihood of pathogenicity assigned using American College of Medical Genetics and Genomics Guidelines (ACMG). Cases refers to number of affected individuals in the family. Subject UK 1 has Decipher ID: 260068. Subject Netherlands 2 has Decipher ID: 323395. Subject Homan 1 has Decipher ID: 318087. Platform refers to sequencing approach: WES, Whole Exome sequencing; WGS, Whole Genome Sequencing; DES Disease gene panel Exome sequencing; XES, X-chromosome Exome Sequencing; prefix t is for trio-based approach. Segg#: segregation studies: yes: segregates beyond trio analysis; n/a: not conducted beyond trio analysis; No, found in healthy male relative (\*recurrent variant found in a healthy male relative in an unrelated family). Results of prediction algorithms colour coded: Red, deleterious/pathogenic; pink potentially deleterious / likely pathogenic.

|               | Gene               | Variant                                                                                                              | Inheritance          | Genotype              | ACMG | Relevant Associated Genetic Disease (MIM)                                                                                     | Notes                                                                                                                                                                                                                                                                                                            |
|---------------|--------------------|----------------------------------------------------------------------------------------------------------------------|----------------------|-----------------------|------|-------------------------------------------------------------------------------------------------------------------------------|------------------------------------------------------------------------------------------------------------------------------------------------------------------------------------------------------------------------------------------------------------------------------------------------------------------|
| Netherlands 1 | ARID1B             | Chr6 g.157528688T>G; NM_020732.3:c.6413T>G; p.Leu2138Arg                                                             | De novo              | Heterozygous          | VUS  | Coffin-Siris Syndrome (135900)                                                                                                | Pathogenicity stems from LOF mutations. No missense mutations reported in OMIM. Patient not displaying hallmark Coffin-Siris Syndromic features (e.g. 5th finger abnormalities). Variant absent in gnomAD.                                                                                                       |
| Netherlands 5 | FBXO28             | Chr1 g.224345411_224345414delCTCT; NM_015176.3:c.1070_1073delCTCT; p.Ser357Leufs*28                                  | De novo              | Heterozygous          | LB   | n/a                                                                                                                           | 4x heterozygous LOF alleles in gnomAD                                                                                                                                                                                                                                                                            |
| USA 5         | PHKA1              | ChrX g.71864208T>C; NM_002637.3:c.1459+4A>G (IVS14+4A>G)                                                             | Maternally Inherited | Hemizygous            | LB   | Muscle glycogenosis (300559)                                                                                                  | Phenotypes do not match. Variant found 1x heterozygous in gnomAD; 4 other variants affecting same splice site found 4x hemizygous in gnomAD; 4x hemizygous LOF alleles found in gnomAD.                                                                                                                          |
| USA 9         | POLG1              | Chr15 g.89870178C>A; NM_002693.2:c.1550G>T; p.Gly517Val                                                              | De novo              | Heterozygous          | LB   | Progressive external ophthalmoplegia (157640)                                                                                 | Phenotypes do not match. 30 LOF heterozygous alleles in GnomAD. Variant absent in gnomAD.                                                                                                                                                                                                                        |
| USA 11        | CDK11A             | Chr1 g.1650770C>T; NM_024011.3:c.352G>A; p.Gly118Arg<br>Chr1 g.1636016C>T; NM_024011.3:c.1537G>A; p.Glu513Lys        | Inherited            | Compound Heterozygous | LB   | n/a                                                                                                                           | 10 LOF homozygous alleles found in gnomAD. Both variants absent in gnomAD                                                                                                                                                                                                                                        |
| USA 13        | MECP2              | ChrX g.153296048G>A; NM_004992.3:c.1231C>T; p.Pro411Ser                                                              | Maternally Inherited | Hemizygous            | VUS  | Severe congenital encephalopathy with early death (300673) and Mental retardation with spasticity and other features (300055) | Missense variants have been associated with male neurodevelopmental disorders. Patient without characteristic Rett Syndromic features (e.g. epilepsy, spasticity). Variant absent in gnomAD.                                                                                                                     |
|               | KDM2B              | Chr12 g.121947486C>T; NM_032590.4:c.1531G>A; p.Glu511Lys<br>Chr12 g.121947542T>C; NM_032590.4:c.1475A>G; p.Lys492Arg | Inherited<br>De novo | Compound Heterozygous | LB   | n/a                                                                                                                           | p.Glu511Lys allele found 4x heterozygous in gnomAD. p.Lys492Arg is absent in gnomAD. >800 LOF alleles in heterozygous state, and 4 LOF alleles in homozygous state in gnomAD                                                                                                                                     |
| USA 17        | SORCS1             | Chr10 g.108432707C>A; NM_001206572.1:c.1977G>T; p.Glu659His                                                          | De novo              | Heterozygous          | LB   | Alzheimer disease 6 (605526)                                                                                                  | Phenotypes do not match. Variants absent in gnomAD. 55 LOF heterozygous alleles in gnomAD.                                                                                                                                                                                                                       |
|               | Duplication 9q21.2 | 525.93kb region spanning 5 genes.                                                                                    | De novo              | Heterozygous          | VUS  | n/a                                                                                                                           | n/a                                                                                                                                                                                                                                                                                                              |
| USA 22        | RPS6KA3            | ChrX g.20179844G>A; NM_004586.2:c.1877C>T; p.Pro626Leu                                                               | Maternally inherited | Hemizygous            | VUS  | Coffin-Lowry syndrome (303600) and XLID (300844)                                                                              | Variant has not been reported in these disorders. Variant absent in gnomAD. Patient not displaying hallmark Coffin-Lowry Syndromic features (e.g. short stature, skeletal abnormalities, hearing deficit, digital features); but may overlap with milder non-syndromic XLID also reported for missense variants. |

**Table S2. Additional genetic variants of note in USP9X cohort.**

**Table S3. Clinical features of individuals with likely pathogenic USP9X missense variants.** Please see accompanying Microsoft Excel File.

**Table S4. Clinical features of individuals with USP9X missense variants of unknown significance.** Please see accompanying Microsoft Excel File.

| Test                  | Genotype |        |    |          |        |    | Statistical Analysis |                        |                            |
|-----------------------|----------|--------|----|----------|--------|----|----------------------|------------------------|----------------------------|
|                       | Usp9x+/Y |        |    | Usp9x-/Y |        |    | Levene's Test        | t-test                 |                            |
|                       | Mean     | SEM    | N  | Mean     | SEM    | N  |                      | Equal Variance Assumed | Equal Variance Not Assumed |
| of.1                  | 1366.34  | 104.84 | 27 | 1760.75  | 111.58 | 19 | 0.464                | 0.015                  | 0.014                      |
| of.2                  | 814.28   | 75.39  | 27 | 1038.33  | 67.84  | 19 | 0.444                | 0.041                  | 0.032                      |
| of.3                  | 619.72   | 71.51  | 27 | 878.23   | 58.38  | 19 | 0.222                | 0.012                  | 0.008                      |
| of.4                  | 468.7    | 59.87  | 27 | 680.38   | 74.67  | 19 | 0.398                | 0.031                  | 0.033                      |
| of.5                  | 501.01   | 64.19  | 27 | 583.86   | 86.68  | 19 | 0.286                | 0.436                  | 0.447                      |
| of.6                  | 391.69   | 57.57  | 27 | 524.01   | 79.49  | 19 | 0.306                | 0.173                  | 0.186                      |
| Body Length           | 3.7      | 0.1    | 30 | 3.4      | 0.1    | 26 | 0.088                | 0.037                  | 0.039                      |
| Spont                 | 2.5      | 0.1    | 30 | 2.6      | 0.1    | 26 | 0.692                | 0.599                  | 0.598                      |
| Respiration           | 2        | 0      | 30 | 2        | 0      | 26 | N/A                  | N/A                    | N/A                        |
| Tremor                | 2        | 0      | 30 | 2        | 0      | 26 | N/A                  | N/A                    | N/A                        |
| Urination in Jar      | 0.3      | 0.1    | 30 | 0.5      | 0.1    | 26 | 0.062                | 0.263                  | 0.277                      |
| Defecation in jar     | 0.8      | 0.2    | 30 | 0.9      | 0.2    | 26 | 0.842                | 0.767                  | 0.765                      |
| Weight                | 26.6     | 0.6    | 30 | 24.4     | 0.4    | 26 | 0.193                | 0.004                  | 0.003                      |
| Transfer.arousal.     | 3.8      | 0.2    | 30 | 3.5      | 0.2    | 26 | 0.274                | 0.2                    | 0.204                      |
| Locomotor Activity    | 21.5     | 1.1    | 30 | 19.1     | 1.3    | 26 | 0.247                | 0.169                  | 0.173                      |
| Palpebral Closure     | 2        | 0      | 30 | 2        | 0      | 26 | 0.029                | 0.287                  | 0.327                      |
| Piloerection.         | 1        | 0      | 30 | 1        | 0      | 26 | 0.029                | 0.287                  | 0.327                      |
| Gait                  | 2.8      | 0.1    | 30 | 2.6      | 0.1    | 26 | 0                    | 0.039                  | 0.044                      |
| Pelvic Elevation      | 2        | 0      | 30 | 2        | 0      | 26 | 0.029                | 0.287                  | 0.327                      |
| Tail Elevation        | 1        | 0      | 30 | 1        | 0      | 26 | 0.029                | 0.287                  | 0.327                      |
| Touch Escape          | 2.5      | 0.1    | 30 | 2.2      | 0.1    | 26 | 0.177                | 0.07                   | 0.077                      |
| Positional Passivity  | 4        | 0      | 30 | 4        | 0      | 26 | N/A                  | N/A                    | N/A                        |
| Trunk.Curl            | 1        | 0      | 30 | 1        | 0      | 26 | 0.007                | 0.196                  | 0.169                      |
| Limb Grasping         | 1        | 0      | 30 | 1        | 0      | 26 | 0.059                | 0.357                  | 0.326                      |
| Visual Placing        | 2.8      | 0.1    | 30 | 2.4      | 0.1    | 26 | 0.358                | 0.024                  | 0.025                      |
| Grip Strength         | 2.9      | 0.1    | 30 | 2.8      | 0.1    | 26 | 0.044                | 0.359                  | 0.38                       |
| Body Tone             | 1.1      | 0      | 30 | 1.1      | 0.1    | 26 | 0.771                | 0.884                  | 0.885                      |
| Pinna.Reflex          | 0.1      | 0.1    | 30 | 0.1      | 0.1    | 26 | 0.807                | 0.944                  | 0.943                      |
| Corneal Reflex        | 1        | 0      | 30 | 1        | 0      | 26 | 0.306                | 0.137                  | 0.163                      |
| Toe.Pinch             | 2.7      | 0.1    | 30 | 2.7      | 0.1    | 26 | 0.899                | 0.831                  | 0.831                      |
| Skin Colour           | 1.6      | 0.1    | 30 | 1.4      | 0.1    | 26 | 0.176                | 0.083                  | 0.094                      |
| Heart Rate            | 1.5      | 0.1    | 30 | 1.6      | 0.1    | 26 | 0.078                | 0.287                  | 0.285                      |
| Limb Tone             | 2        | 0.1    | 30 | 1.9      | 0.2    | 26 | 0.466                | 0.485                  | 0.487                      |
| Abdominal Tone        | 1        | 0      | 30 | 1        | 0      | 26 | 0.059                | 0.357                  | 0.326                      |
| Lacrimation           | 1        | 0      | 30 | 1        | 0      | 26 | 0.84                 | 0.92                   | 0.92                       |
| Salivation            | 1.8      | 0.1    | 30 | 1.8      | 0.1    | 26 | 0.412                | 0.985                  | 0.985                      |
| Provoked Biting       | 0.2      | 0.1    | 30 | 0.2      | 0.1    | 26 | 0.972                | 0.821                  | 0.821                      |
| Righting Reflex       | 3        | 0      | 30 | 3        | 0      | 26 | 0.059                | 0.357                  | 0.326                      |
| Negative Geotaxis     | 3.7      | 0.1    | 30 | 3.3      | 0.2    | 26 | 0.033                | 0.136                  | 0.147                      |
| Wire Manoeuvr         | 3.9      | 0.1    | 30 | 3.8      | 0.1    | 26 | 0.649                | 0.723                  | 0.72                       |
| Contact Righting.     | 1        | 0      | 30 | 1        | 0      | 26 | N/A                  | N/A                    | N/A                        |
| Fear                  | 0.4      | 0.1    | 30 | 0.3      | 0.1    | 26 | 0.98                 | 0.951                  | 0.951                      |
| Irritability          | 0.9      | 0      | 30 | 0.9      | 0      | 26 | 0.691                | 0.843                  | 0.842                      |
| Aggression.           | 0.7      | 0.1    | 30 | 0.7      | 0.1    | 26 | 0.819                | 0.806                  | 0.805                      |
| Vocalization          | 0.6      | 0.1    | 30 | 0.8      | 0.1    | 26 | 0.023                | 0.09                   | 0.087                      |
| Grip Strength 1       | 1.34     | 0.08   | 30 | 1.09     | 0.05   | 26 | 0.026                | 0.011                  | 0.009                      |
| Grip Strength 2       | 1.29     | 0.06   | 30 | 1.02     | 0.03   | 26 | 0                    | 0                      | 0                          |
| Grip Strength 3       | 1.2      | 0.06   | 30 | 1.06     | 0.04   | 26 | 0.022                | 0.079                  | 0.07                       |
| Average Grip Strength | 1.28     | 0.06   | 30 | 1.06     | 0.04   | 26 | 0.001                | 0.005                  | 0.004                      |
| Hot Plate 1           | 7.7      | 1.3    | 3  | 9        | 1.2    | 6  | 0.685                | 0.522                  | 0.487                      |
| Hot Plate 2           | 6.9      | 1.2    | 3  | 12.9     | 2.1    | 6  | 0.258                | 0.095                  | 0.039                      |
| Hot Plate 3           | 7.4      | 1.2    | 3  | 11.9     | 1.8    | 6  | 0.345                | 0.142                  | 0.073                      |
| Average Hot Plate     | 7.3      | 0.94   | 3  | 11.24    | 1.41   | 6  | 0.336                | 0.11                   | 0.053                      |

**Table S5. Results of SHIRPA neurological screen of mice lacking USP9X in the developing and adult forebrain structures. Tests highlighted in green identify statistical difference.**

**Antibodies for Western Blot**

| Antigen          | Species | Dilution | Source                                  |
|------------------|---------|----------|-----------------------------------------|
| USP9X            | rabbit  | 1:500    | Bethyl Laboratories, USA                |
| Raptor           | rabbit  | 1:1000   | Cell Signaling Technology, USA          |
| SMURF1           | mouse   | 1:250    | Abcam                                   |
| Phospho-S6       | rabbit  | 1:1000   | Cell Signaling Technology               |
| S6               | rabbit  | 1:1000   | Cell Signaling Technology               |
| SMAD4            | mouse   | 1:200    | Santa Cruz Biotechnology                |
| ITCH             | rabbit  | 1:1000   | Cell Signaling Technology               |
| MIB1             | rabbit  | 1:1000   | Abcam                                   |
| CTNNB1           | mouse   | 1:1000   | BD Transduction Laboratories, Australia |
| activated CTNNB1 | mouse   | 1:300    | Millipore, Merck, Australia             |
| MCL1             | mouse   | 1:250    | BD Pharmingen, Australia                |
| ACTB             | mouse   | 1:20000  | Sigma-Aldridge                          |

**Antibodies for Immunofluorescence**

| Antigen          | Species | Dilution | Source                        |
|------------------|---------|----------|-------------------------------|
| USP9X            | rabbit  | 1:500    | Bethyl Laboratories, USA      |
| SMAD4            | mouse   | 1:200    | Santa Cruz Biotechnology, USA |
| activated CTNNB1 | mouse   | 1:500    | Millipore, Merck, Australia   |

**Table S6. Antibodies used in this study.**



| Family         | Approving Institutional Review Board                                                                         |
|----------------|--------------------------------------------------------------------------------------------------------------|
| USA 6          | Women's and Children's Health Network Human Research Ethics Committee, South Australia.                      |
| USA 5          | University of Michigan Review Board, MI, USA                                                                 |
| France 2       | French Law on Genetic Tests (Law of Bioethics)                                                               |
| UK1            | UK Research Ethics Committee approvals 10/H0305/83 and GEN/284/12.                                           |
| USA 14         | Western Institutional Review Board, Puyallup, WA, USA                                                        |
| France 3       | French law on genetic tests (law of Bioethics)                                                               |
| USA 13         | Women's and Children's Health Network Human Research Ethics Committee, South Australia, Australia            |
| USA 18         | Cedars Sinai Institutional Review Board (Protocol #00046408), CA, USA                                        |
| USA 1          | UPMC Children's Hospital of Pittsburgh, PA, USA                                                              |
| USA 19         | Cedars Sinai Institutional Review Board (Protocol #00046408), CA, USA                                        |
| Spain 1        | Women's and Children's Health Network Human Research Ethics Committee, South Australia.                      |
| Portugal 1     | Medical Genetics Unit, Hospital Pediátrico, Centro Hospitalar e Universitário de Coimbra, Coimbra, Portugal. |
| USA 7          | Cedars Sinai Institutional Review Board (Protocol #00046408), CA, USA                                        |
| Netherlands 11 | Clinical Exome Sequencing study University Medical Center Utrecht, The Netherlands                           |
| USA 9          | Cedars Sinai Institutional Review Board (Protocol #00046408), CA, USA                                        |
| USA 3          | Cook Children's Medical Center IRB, TX, USA                                                                  |
| Netherlands 9  | Clinical Diagnostic Exome Sequencing Study, Radboud University Medical Center Hospital, The Netherlands      |
| Netherlands 12 | Clinical Diagnostic Exome Sequencing Study, Erasmus University Medical Center Hospital, The Netherlands      |
| USA 12         | Cedars Sinai Institutional Review Board (Protocol #00046408), CA, USA                                        |
| Canada 2       | Cedars Sinai Institutional Review Board (Protocol #00046408), CA, USA                                        |
| Netherlands 10 | Clinical Diagnostic Exome Sequencing Study, Utrecht University Medical Center Hospital, The Netherlands      |
| Netherlands 1  | Clinical Diagnostic Exome Sequencing Study, Radboud University Medical Center Hospital, The Netherlands      |
| Netherlands 7  | Clinical Diagnostic Exome Sequencing Study, Radboud University Medical Center Hospital, The Netherlands      |
| USA 21         | National Human Genome Research Institute, USA                                                                |
| USA 11         | Cedars Sinai Institutional Review Board (Protocol #00046408), CA, USA                                        |
| USA 22         | Mayo Clinic Institutional Review Board, MN, USA                                                              |
| Spain 2        | Hospital Universitario Quirónsalud de Madrid Ethics Board, Spain.                                            |
| USA 17         | Cedars Sinai Institutional Review Board (Protocol #00046408), CA, USA                                        |
| USA 26         | Duke University Medical Center, NC, USA                                                                      |
| Canada 6       | The Hospital for Sick Children Research Ethics Board (REB#1000054798), Canada.                               |
| USA 28         | Nationwide Children's Hospital Ethics Board (IRB11-00215), OH, USA                                           |
| Netherlands 3  | Clinical Diagnostic Exome Sequencing Study, Utrecht University Medical Center Hospital, The Netherlands      |
| Canada 1       | Children's Hospital of Eastern Ontario, Canada                                                               |
| Canada 3       | Cedars Sinai Institutional Review Board (Protocol #00046408), CA, USA                                        |
| Netherlands 5  | Clinical Diagnostic Exome Sequencing Study, VU University Medical Center, The Netherlands                    |
| Netherlands 2  | Clinical Diagnostic Exome Sequencing Study, Radboud University Medical Center Hospital, The Netherlands      |
| Netherlands 6  | Clinical Diagnostic Exome Sequencing Study, Radboud University Medical Center Hospital, The Netherlands      |
| Swiss 1        | Cantonal Ethical Board Zurich, Switzerland.                                                                  |
| Norway 1       | University Hospital of North Norway, Tromsø, Norway                                                          |
| Canada 5       | Children's Hospital of Eastern Ontario, Canada                                                               |
| Netherlands 4  | Clinical Diagnostic Exome Sequencing Study, Radboud University Medical Center Hospital, The Netherlands      |
| Netherlands 8  | Clinical Diagnostic Exome Sequencing Study, Radboud University Medical Center Hospital, The Netherlands      |
| Belgium 1      | French Law on Genetic Tests (Law of Bioethics)                                                               |
| France 1       | French Law on Genetic Tests (Law of Bioethics)                                                               |
| USA 4          | The University of Texas Health Science Center at Houston, HSC-MS-09-0057, TX, USA                            |
| USA 29         | Nationwide Children's Hospital IRB, OH, USA                                                                  |
| Germany 1      | Ethics Board of the Medical Faculty of the University of Heidelberg, Germany                                 |
| Denmark 1      | University Hospital Copenhagen, Denmark                                                                      |

Table S7. Patient consent protocols.

# **SUPPLEMENTAL CLINICAL DATA** **DESCRIPTION**

## USA 6

**Variant:** ChrX GRCh37(hg19) g.40988391A>G; NM\_001039590.2 c.235A>G, NP\_001034679.2 p.Ile79Val.

**Discovery Platform:** Trio based whole exome sequencing

**Other variants of significance:** No

**ACMG Classification:** Likely Pathogenic

**Authors:** Tyler Pierson, Elizabeth Bhoj, Stephanie Byers

**Pedigree:**

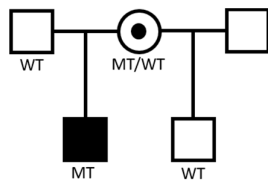

**Clinical Notes:**

Patient now 19 years old has intellectual disability, developmental delay, absent speech, seizures, hypotonia, severe motor disability (non-ambulatory), short stature, relative macrocephaly. Patient uses gastric tube for feeding and has gastroesophageal reflux. Facial dysmorphism includes short palpebral fissures, large incisors, full eyebrows. Fingers are short and trident-shaped.

Brain MRI revealed progressive cerebral and cerebellar volume loss, hypodensity in the left basal ganglia, unchanged and consistent with a lacune infarct (remote). There is a less conspicuous area of hypodensity on the contralateral side. There are hypodense white matter changes along the periventricular white matter and bilateral centrum semiovale.

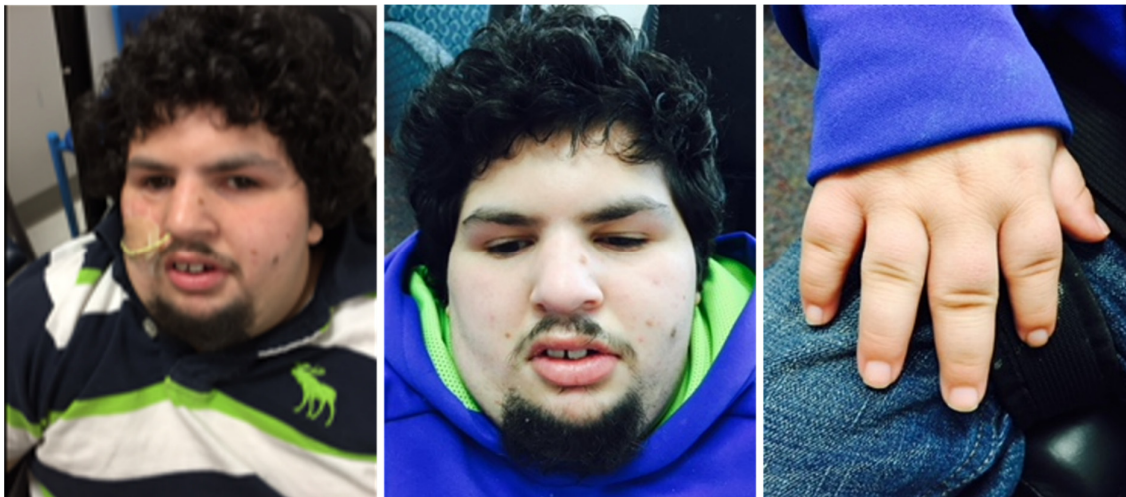

## USA 5

**Variant:** ChrX GRCh37(hg19) g.40994047T>A; NM\_001039590.2 c.392T>A; NP\_001034679.2 p.Ile131Asn.

**Discovery Platform:** Trio based whole exome sequencing



**Other variants of significance:** No; Variant of unknown significance in PHKA1 [c.1459+4A>G (IVS14+4A>G)]

**ACMG Classification:** Likely Pathogenic

**Authors:** Catherine E. Keegan

**Pedigree:**

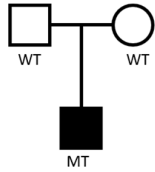

**Clinical Notes:**

A 9 year old male initially referred for evaluation at 9 months of age due to a history of hypotonia and left clubfoot requiring casting. He was the product of an uncomplicated pregnancy, delivered at 39 weeks of gestation, and weighing 8 lbs 3 oz. The clubfoot was identified while in utero. Following delivery, it was noted that he had hypotonia and feeding problems due to a poor suck. A brain MRI revealed a thin posterior corpus callosum and midbrain at the lower limits of normal in size. Physical findings on exam were a prominent anterior fontanelle and right-sided posterior plagiocephaly, mild frontal bossing, somewhat low-set ears that were normally rotated. He had epicanthal folds and inferior orbital creasing, a flat nasal bridge, wide nose, a sacral dimple with a visualized base, small toenails, and significant head lag on pull to sit.

The patient was referred for re-evaluation at age 9 after having been lost to follow up due to persistent hypotonia, generalized weakness, speech apraxia and dysarthria. A recent brain MRI redemonstrated mildly enlarged trigones with thinning of the posterior aspect of the corpus callosum and superimposed generalized low white matter volume. An arachnoid cyst versus a cisterna magna in the posterior fossa was also identified. He had a neurological evaluation for possible absence-type seizures; his EEG was normal. He had had a normal cardiology evaluation including a normal EKG and echo. He was evaluated by Pediatric Ophthalmology where he was noted to have a mild astigmatism and exotropia. He had been diagnosed with obstructive sleep apnea and subsequently had a tonsillectomy. Other past medical history included constipation, eczema, alopecia involving his posterior scalp, pitted and ridged nails, and hypodontia (two missing teeth).

His examination at age 9 revealed a weight of 20.4 kg (0.8th percentile), a height of 122.5 centimeters (4.5th percentile), and a head circumference of 51.9 centimeters (38th percentile), consistent with relative macrocephaly. He had a tall, broad forehead. He had mild ptosis. Skin exam was unremarkable. He had ridging of his fingernails. He had reduced muscle bulk in both the upper and lower extremities and hypotonia. He had joint laxity notable at the fingers, wrists, elbows and knees, as well as pes planus.

The patient was reported to have a significant history of developmental delay in both motor and speech and language, although he has continued to make slow developmental progress. His motor milestones include sitting at 10 months, crawling at 12 to 13 months, and walking independently at 3 years of age. He has apraxia of speech. His receptive language was reported to be more advanced than his expressive language. He is presently in a moderately cognitively impaired program receiving multiple services and therapies.

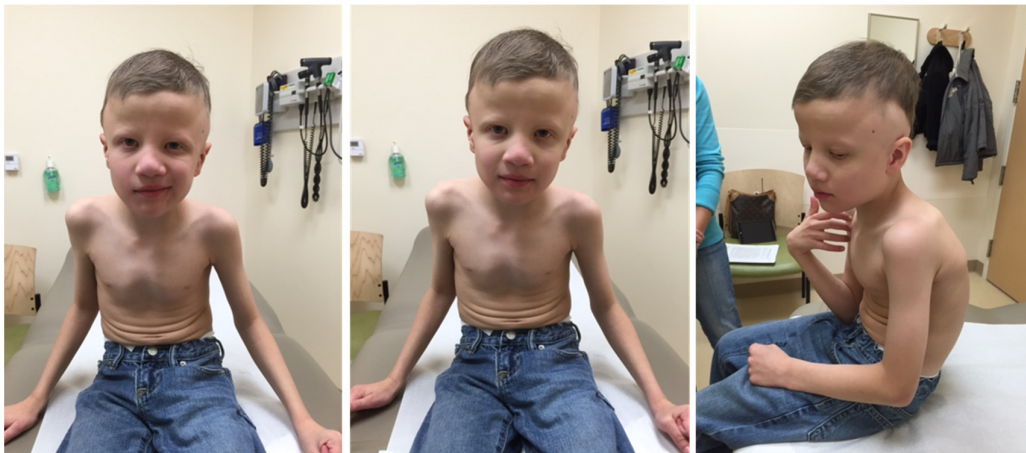

## FRANCE 2

**Variant:** ChrX GRCh37 (hg19) g.41025226C>T; NM\_001039590.2 c.2087C>T; NP\_001034679.2 p.Ala696Val

**Discovery Platform:** Whole exome sequencing.

**Other variants of significance:** No

**ACMG Classification:** Likely Pathogenic

**Authors:** Martine Raynaud, Laurent Pasquier

**Pedigree:**

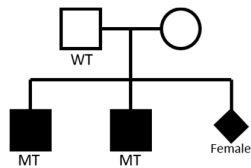

**Clinical Notes:**

The clinical picture was very severe and was identical in two brothers separated by two years, who died very early after birth. Prenatally they displayed intrauterine growth restriction and increased echogenicity of the fetal bowel. Postnatally they had meconium ileus, pancytopenia, punctuated epiphysis. MRI revealed malformation of cortical development (reduced gyration with thickening of the cerebral cortex, thin corpus callosum, features of double cortex on temporal lobes) Extended metabolic explorations were normal.

## UK1

**Variant:** ChrX GRCh37(hg19) g.41027299 C>T; NM\_001039590.2 c.2464C>T; NP\_001034679.2 pArg822Cys

**Discovery Platform:** Trio based whole exome sequencing

**Other variants of significance:** No

**ACMG Classification:** Likely Pathogenic

**Authors:** Henrietta Lefroy, Usha Kini.

**Pedigree:**

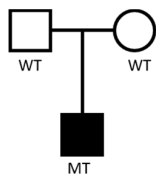

**Clinical Notes:**

9 year old boy referred due to developmental delay, thoracolumbar scoliosis, hypotonia and microcephaly. He is the fourth child of unrelated parents. He has three older brothers, the oldest of whom has speech and language difficulties.

His parents became concerned at 6 months as they felt he was quite floppy. His motor milestones were delayed; sitting unsupported at 11 months and standing with support at 13 months. He is unable to walk at 9 years of age but can use a standing frame and walker. He is also able to mobilise via bottom shuffling. In terms of his speech, he began making sounds such as 'mmm' by 2.5 years. At 9 years he has no words but makes non-specific noises. His understanding is limited but he does recognise familiar people and objects.

He was diagnosed with significant thoracolumbar scoliosis from 6 months which was treated with a spinal plaster cast and subsequently magec rods from T2 to L4. He had positional plagiocephaly. He was found to have a Duane anomaly affecting his left eye. He had grommets inserted for glue ear. He has a persistent defect in his tympanic membrane and ongoing discharge.

On examination he has striking coarse blonde hair and blue eyes. He has microcephaly (< 0.4th centile, -2 SD). He has facial asymmetry with deep set eyes and broad anteverted nares. He has overlapping 2/3rd toes bilaterally and thin arms and legs.

His investigations include an MRI brain which revealed mildly dilated, mildly dysmorphic ventricles and an 'impression' of reduced white matter which was normally myelinated. His genetic testing included an array-CGH which showed a paternally inherited 7q31 deletion. This only contained one gene; *IMMP2* and was felt less likely to be significant. He underwent testing for Prader-Willi syndrome which did not find an abnormality. He was then enrolled into the DDD study which revealed a de novo *USP9X* mutation.

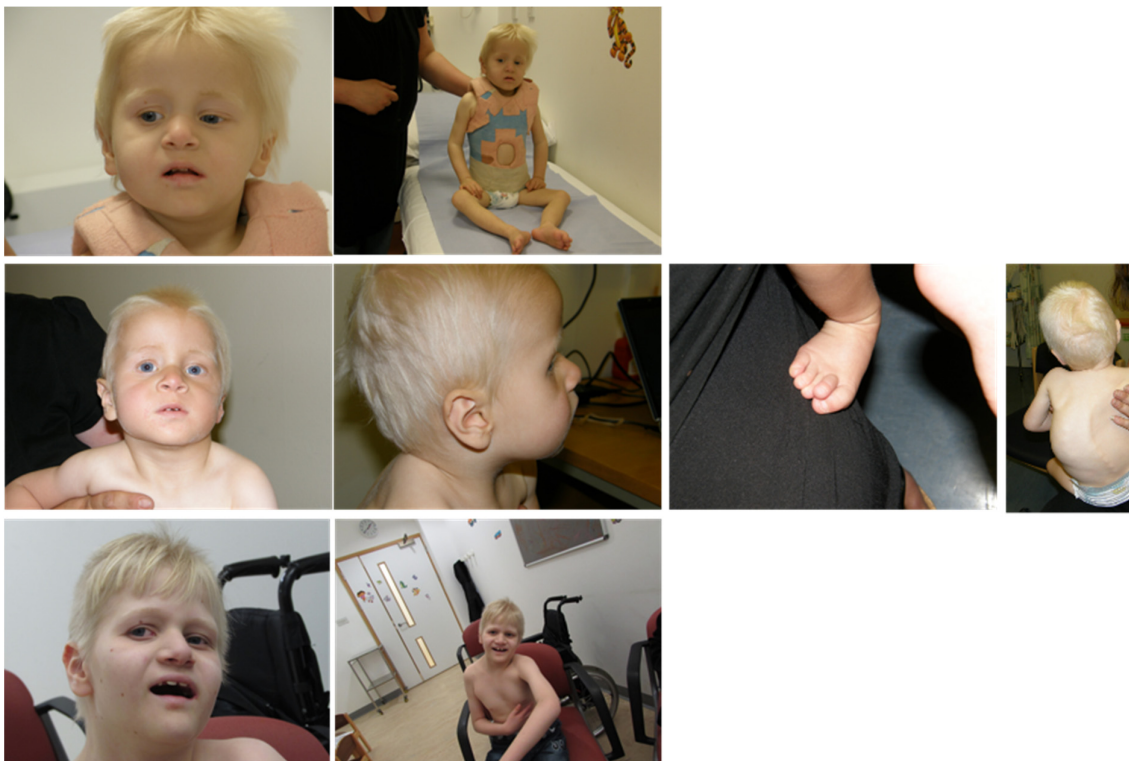

## USA 14

**Variant:** ChrX GRCh37(hg19) g. 41029757A>G; NM\_001039590.2 c. 2912A>G; NP\_001034679.2 p.Asn971Ser

**Discovery Platform:** Trio based whole exome sequencing

**Other variants of significance:** No.

**ACMG Classification:** Likely Pathogenic.

**Authors:** Keri Ramsey

**Pedigree:**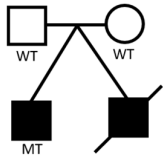**Clinical Notes:**

Patient has Global developmental delay, severe intellectual disability, speech delay (babbling) spastic quadriparesis (non-weight bearing; tight abductors in his legs, non ambulatory), hypotonia (truncal, head lag, slips through at shoulders, joint hypermobility). Brain MRI shows possibly delayed myelination or gliosis in the posterior periventricular white matter.

Has severe growth retardation (receives growth hormone), and is of short stature. Brachycephaly, prominence of the temples (on either side of the orbits), shallow orbits, mid face hypoplasia, flat nasal bridge, prominence of midline forehead resembles slightly the Kleeblattshadel deformity, intermittent nystagmus with lateral gaze. Had Bi-lateral hip dysplasia requiring surgery. Fed completely by G-tube because of aspiration. Is hypoglycemic.

Had a twin brother that died at 1 year of respiratory illness. Twins thought to be monozygotic because they were in the same sac. Twin diagnosed with congenital heart disease.

MRI at 20 months

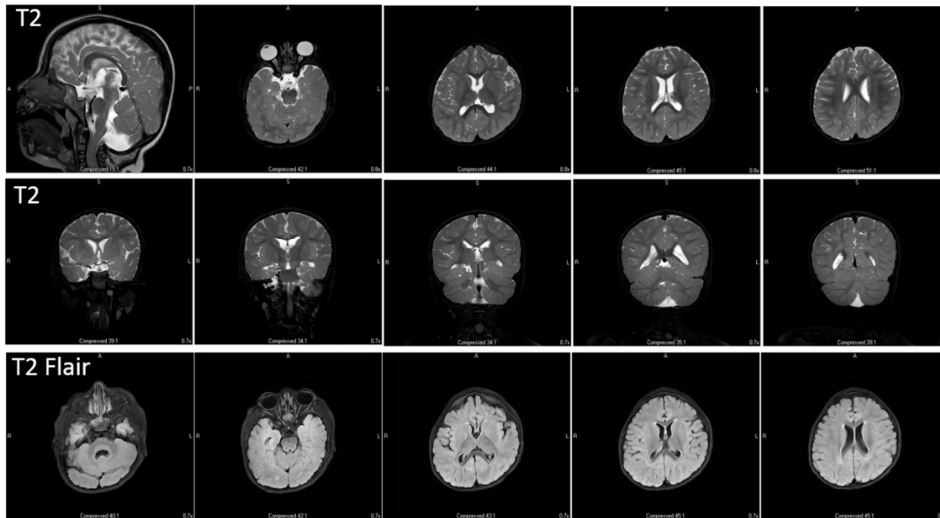**France 3**

**Variant:** ChrX GRCh37(hg19) g.41057806C>T; NM\_001039590.2 c.4406C>T; NP\_001034679.2 p.Pro1469Leu

**Discovery Platform:** Trio based whole exome sequencing

**Other variants of significance:** No.

**ACMG Classification:** Likely Pathogenic.

**Authors:** Boris Keren, Alexandra Afenjar, Thierry Billette de Villemeur

**Pedigree:**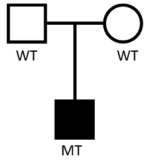**Clinical Notes:**

Severe developmental delay and intellectual disability. Started walking at 6 years old. Has hypotonia and motor disability and broad based gait. Has autistic, obsessive and aggressive behaviors. Displayed growth retardation and is of short stature. Has joint hypermobility. Dysmorphisms include broad thumbs, broad nasal tip, palpebral fissure oblique down. Has feeding difficulties and gastro-esophageal reflux. Is hyperglycemic.

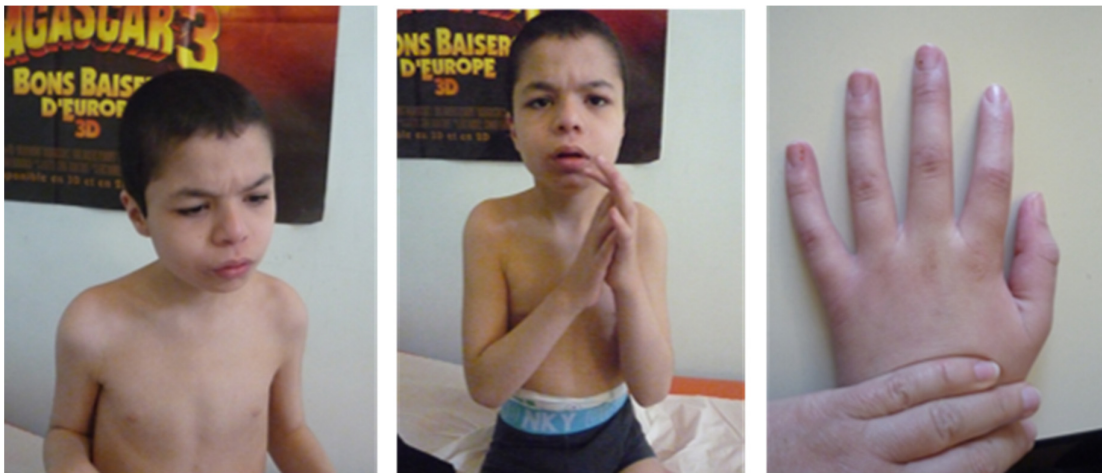**USA 13**

**Variant:** ChrX GRCh37(hg19) g.41060427A>T; NM\_001039590.2 c.4718A>T; NP\_001034679.2 p.Gln1573Leu

**Discovery Platform:** Trio based whole exome sequencing

**Other variants of significance:** No. *MECP2* maternally inherited (c.1231C>T; p.Pro411Ser) – previously reported in hemizygous state in 2 individuals in gnomAD; *KDM2B* – 2 heterozygous variants (c.1531G>A;p.Glu511Lys – maternally inherited) and (c.1475A>G;p.Lys492Arg – de novo) – of unknown significance.

**ACMG Classification:** Likely Pathogenic.

**Authors:** Carey Mcdougall, Elaine Zackai

**Pedigree:**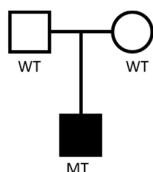

**Clinical Notes:**

Global developmental delay, speech delay, hypotonia and motor disability. Slight myopia. Facial dysmorphisms include mild upslant to palpebral fissures, mildly low set ears, short philtrum and bulbous nasal tip. Has slow weight gain and requires soft foods. Has hyperextensibility of joints and skin.

**USA 18**

**Variant:** ChrX GRCh37(hg19) g.41073847C>A; NM\_001039590.2 c.5216C>A; NP\_001034679.2 p.T1739N

**Discovery Platform:** Trio based whole exome sequencing

**Other variants of significance:** No

**ACMG Classification:** Likely pathogenic

**Authors:** Tyler Pierson, Naomi Yachelevich

**Pedigree:**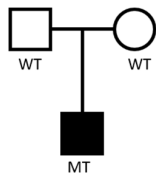**Clinical Notes:**

Subject is a former full-term 5yo boy with a history of a diagnosis of autistic spectrum disorder. He has also been found to have diffusely low tone. He had normal growth parameters at births and was noted to have mild neonatal jaundice. He spent some time in the NICU to gain some extra weight, as well as having some difficulty regulating his temperature, which corrected over the next few days. He had significant infantile hypotonia with subsequent delayed motor milestones. He started walking at 2 years of age. Has wide based gait and pseudoataxia in gait may be due to low tone - wears SMOs, has external rotation of lower extremities with excessive pronation of both feet. Parents state that he is generally happy and eats well, and is affectionate. He has challenges with communication and sensory issues. He has some self-stimulatory behaviour, and often clenches his hands and gets very excited by anything to do with numbers or clocks. He tends to have certain interests such as exit signs and red lights, as well as anything with numbers. He has alternating exophoria. They feel he can follow 2-step commands, but anything more is quite challenging for him. He knows his letters and numbers, and can count up to 100. He has a little wide-based gait as well. He had some mildly diffuse low tone, which involved both his axial and appendicular musculature. His bulk was normal. His strength was within normal limits. Deep tendon reflexes were hypoactive at 1/5 throughout. Plantar responses were flexor bilaterally. Mildly decreased sensation with regard to light touch, temperature and vibratory sense, but that could be secondary to his cooperation waning at this point. He had an MRI, which suggested some mild colpocephaly. Brain MRI shows Periventricular Leukomalacia; Periventricular Leukomalacia; 'mild FLAIR hyperintensity along the periventricular white matter most prominent in parietal regions bilaterally which show mild thinning'; also small cystic foci in periventricular white matter bilaterally. Dysmorphisms include deep set eyes, bilateral epicanthus, flat nasal bridge, mild hypertelorism, full eyebrows. Has calcaneovalgus feet, joint hypermobility, tight heel cords. Metabolic testing revealed low free carnitine, high lactate, low thyroxine.



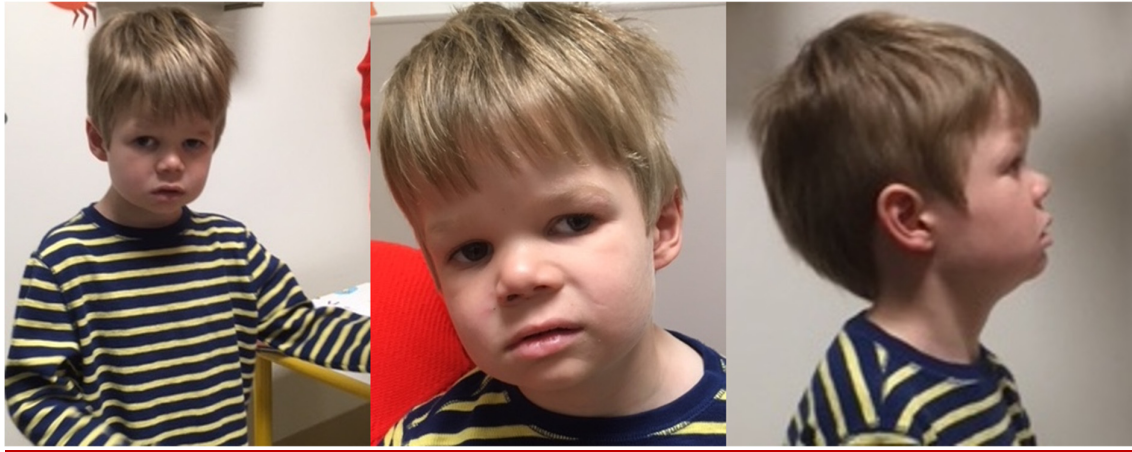

## USA 1

**Variant:** ChrX GRCh37(hg19) g.41075423T>A; NM\_001039590.2 c.5603T>A; NP\_001034679.2 p.V1868E

**Discovery Platform:** Trio-based whole exome sequencing.

**Other variants of significance:** No

**ACMG Classification:** Likely Pathogenic

**Authors:** Elena Infante, Amy Goldstein, Suneeta Madan-Khetarpal

**Pedigree:**

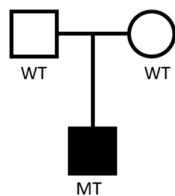

**Clinical Notes:**

At 6 years, patient with intellectual disability, global delay (non-verbal, cannot walk independently), cortical visual impairment and hypotonia (Tone decreased centrally). Displays occasional chorea and dystonic posturing of hands but not when in use. Ankle dystonia when walking. Displays some flapping/stereotypies. Has a history of febrile seizures with normal EEG.

Has some dysmorphic facial features including ears which are very small, malformed, and posteriorly rotated.

Repeated Brain MRI was stable, showing a thin corpus callosum with associated colpocephaly of the lateral ventricles, a suggestion of bilateral polymicrogyria along the sylvian fissures, bilateral hippocampal malrotation, stable, bilateral hypoplastic olfactory bulb, stable, and a left middle cranial fossa arachnoid cyst, which is stable.

At 7 years, walks independently with very wide-based gait. Has major issues with anxiety/overstimulation. He gets very fearful, tearful and stiff. Seizures present. A recorded event revealed Epileptiform discharges noted as generalized spike and slow wave discharges. Electroclinical seizures were recorded as numerous brief typical absences recorded, clinically presenting with staring, unresponsiveness and eye flutter, and associated with 3 Hz generalized spike and slow wave activity on the EEG, lasting approximately 12-16 seconds each. Treatment initiated with Depakote.

## USA 19

**Variant:** ChrX GRCh37(hg19) g.41075854T>A; NM\_001039590.2 c.6034T>A; NP\_001034679.2 p.F2012I

**Discovery Platform:** Trio based whole exome sequencing

**Other variants of significance:** No

**ACMG Classification:** Likely pathogenic

**Authors:** Tyler Pierson, Angela E. Lin, MD, Marcie A. Steeves, Mohammed Ali Almuqbil

**Pedigree:**

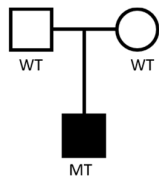

**Clinical Notes:**

Prenatal US suggested trisomy 13 or 18 with ventriculomegaly, bilateral clubfeet, bilateral polydactyly, unusual facial features.

Patient now 3 ½ years.

Global developmental delay, severe ID, non-verbal, chronic epilepsy, hypotonia, motor disability, growth restriction (weight <3rd, height 3rd (OFC not measured)). Anomalies have included: Laryngeal cleft, type 1, postaxial polydactyly type B of hands, Striking diffuse joint hypermobility, retroflexed hips, clubbed feet bilaterally and feeding difficulties (needs G-tube).

Brain MRI #1 at birth showed evidence of infarcts in bilateral temporal, occipital, parietal lobes, partial agenesis of corpus callosum, cerebellar hypoplasia, ventriculomegaly, piriformis aperture stenosis and probable hypoplasia of the pituitary gland. MRI #2 at 15 months: Unchanged appearance of callosal dysgenesis, left cerebellar hypoplasia and probable hypoplasia of the pituitary gland. Unchanged size and configuration of the dilated ventricles.

5 ½ year old sister has absence seizures, normal brain MRI.

## Spain 1

**Variant:** ChrX GRCh37(hg19) g.41077669G>A; NM\_001039590.2 c.6254G>A; NP\_001034679.2 p.R2085H

**Discovery Platform:** Trio based whole exome sequencing

**Other variants of significance:** No

**ACMG Classification:** Likely Pathogenic.

**Authors:** Carlos López-Otín, Olaya Santiago-Fernández

**Pedigree:**

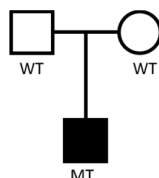



**Clinical Notes:**

Patient has intellectual disability, developmental delay, speech delay, hypotonia, motor disability, visual impairment (myopia, strabismus). Brain MRI revealed hypoplasia of cerebellum vermis and Dandy Walker malformation, dysplasia of corpus callosum, ventriculomegaly, and white matter loss. Dysmorphisms including Bilateral epicanthus, Flat Nasal Bridge, clinodactyly IIIth to Vth toes, ear fissure, bilateral equinovarus feet and hyperextensibility of joints and skin.

**Portugal 1**

**Variant:** ChrX GRCh37 (hg19) g.41082601T>C; NM\_001039590.2 c.6697T>C; NP\_001034679.2 p.Ser2233Pro

**Discovery Platform:** TrusightOne disease exome.

**Other variants of significance:** No

**ACMG Classification:** Likely Pathogenic

**Authors:** Cláudia Falcão-Reis, Joaquim Sá

**Pedigree:**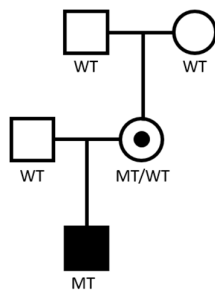**Clinical Notes:**

Patient delivered at 39 weeks with normal growth parameters, APGAR score 6,8,9. During gestation: transient placental abruption during 2nd trimester and oligohydramnios after amniocentesis (advanced maternal age – 36YO; prenatal karyotype 46,XY), no abnormalities noted on ultrasound. Sent to the NICU after birth because of suspected sepsis (10 days duration), bilateral hip dysplasia and cryptorchidism were noted and managed.

At 3 years of age patient presented with severe developmental delay (non-verbal) with global hypotonia (non-ambulant) and sometimes auto-aggression (very slow progress since age 3, no regression). Dysmorphic facial features include low anterior hairline, synophrys, broad and depressed nasal tip, spaced teeth. Patient has broad and large great toes, hyperextensibility of joints and skin, small ovoid scalp aplasia cutis (secondary to birth trauma?). Growth has been normal (weight, stature and OFC between 25th and 50th centile). Brain MRI revealed lateral ventriculomegaly, peripheral T2 hypersignal areas, hypoplasia of corpus callosum.

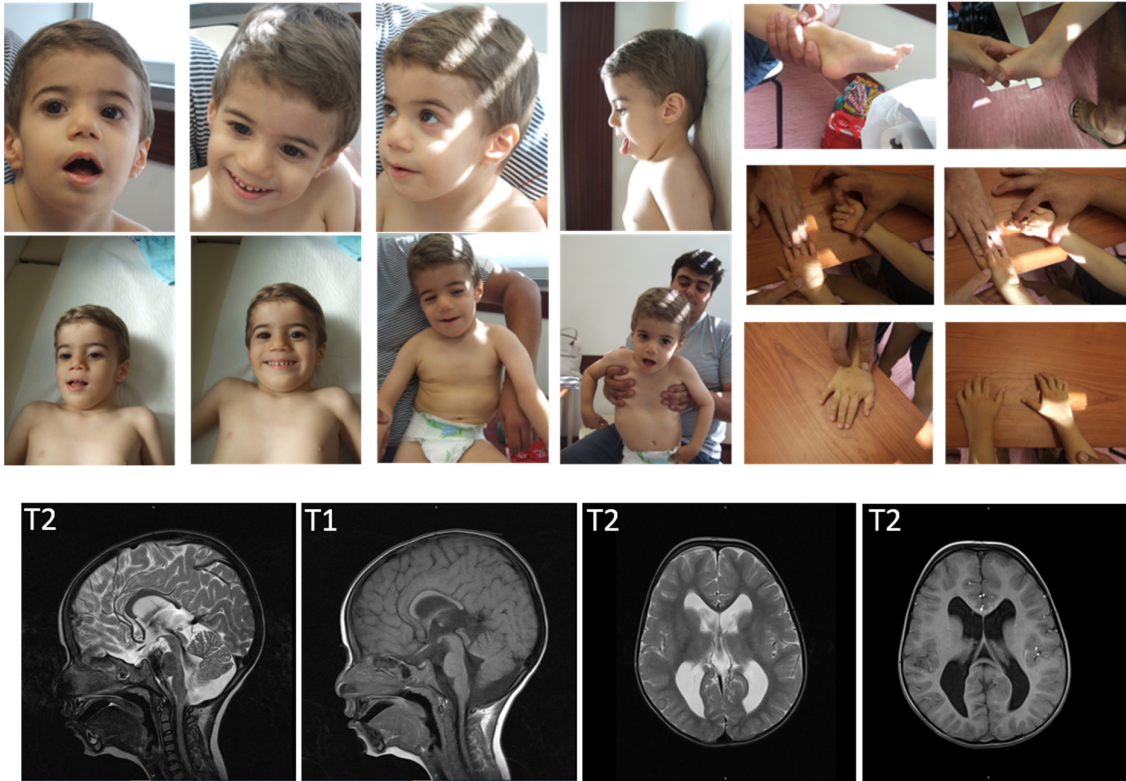

## USA 7

**Variant:** ChrX GRCh37(hg19) g.40994022G>T; NM\_001039590.2 c.367G>T; NP\_001034679.2 p.G123W

**Discovery Platform:** Trio based whole exome sequencing

**Other variants of significance:** No

**ACMG Classification:** Unknown significance.

**Authors:** Tyler Pierson, Yezmin Perilla-Young, Laurie Smith

**Pedigree:**

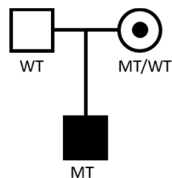

### **Clinical Notes:**

Patient with hypotonia, profound developmental and intellectual impairment and seizures of unknown etiology. Has speech delay (communicates by picture book, some sign language. uses only two words), autism, partial idiopathic epilepsy, hypotonia, motor disability, repetitive behaviors hand flapping and is irritable. Has motor disability, with waddling gait and requires ankle-foot orthosis for walking. Displays macrocephaly, pectus carinatum, and bilateral coxa valga. Brain MRI shows delayed maturation of white matter, thinning corpus collosum, small pituitary gland, and posterior positioning of the cerebral arteries. Dysmorphisms include turricephalic, tall forehead, arched eyebrows, down slanted palpebral fissures, slightly posteriorly rotated ears with small cartilaginous nodule on posterior caudal aspect, flat foot, persistent finger pads, 5th finger clinodactyly, cryptorchidism.

## Netherlands 11

**Variant:** ChrX GRCh37(hg19) g.40996160C>A; NM\_001039590.2 c.539C>A; NP\_001034679.2 p.Pro180His

**Discovery Platform:** whole exome sequencing

**Other variants of significance:** ?.

**ACMG Classification:** Unknown significance

**Authors:** Renske Oegema, Bert van der Zwaag, E. van Binsbergen

**Pedigree:**

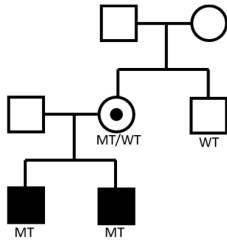

**Clinical Notes:**

Proband is a 21-year old male with moderate to severe ID, epilepsy and spasticity, and on brain MRI thin corpus callosum. He has a sacral dimple, hip dysplasia. In childhood he had hypotonia and recurrent upper respiratory tract infections. He was born at 37 weeks of gestation, in breech position. He underwent surgery for bilateral inguinal hernia at 6 weeks of age. His development was delayed from birth. He started crawling after his second birthday and walking at 4 years of age. Epilepsy was diagnosed at age 3. Generally he has a friendly and cheerful personality. Occasionally he has temper tantrums. Clinical genetic examination: speaks a few words, makes noises. OFC 59 cms (+0.75 SDS). He has a broad forehead, deep set eyes with full upper eyelids. Broad base to the nose, broad mouth. Caries dentition. Small, posteriorly rotated ears. Large hands with long fingers (hand 21.5 cm, third finger 9.5 cm). Thumbs cannot be fully extended. There is an abnormal shape of the thorax with low set nipples. He has pes equines, hammer toes and calf muscle atrophy.

His brother is more severely disabled, he never gained independent walking and his behaviour is more challenging. He can crawl and ride a (special) bicycle. He speaks 7-8 words and used speech computer and signing. He is not diagnosed with epilepsy. He was born after 33 weeks of gestations with postaxial polydactyly. Pregnancy was complicated by HELLP syndrome. BW 1880 grams (normal), Apgar 4/8. He was admitted to the neonatal care unit, and treated for respiratory insufficiency and hyperbilirubinemia. He suffers from constipation. He has scoliosis. OFC 56.7 cm (- 0.5 SD).

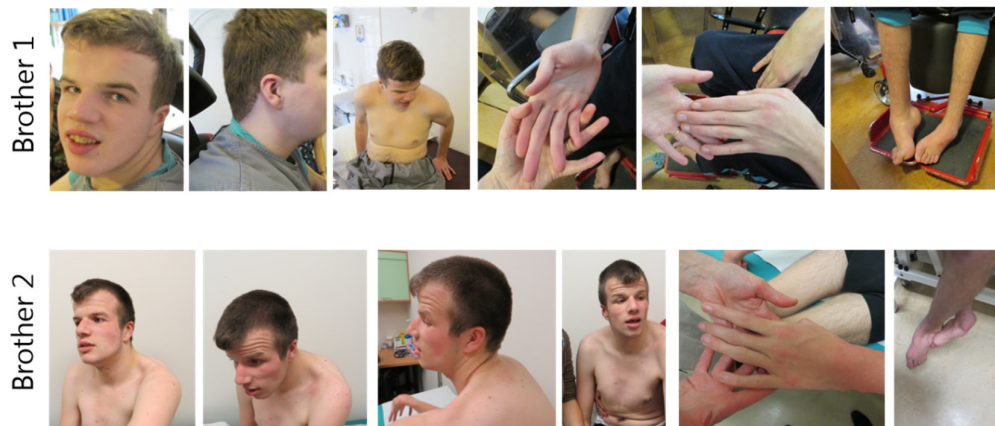

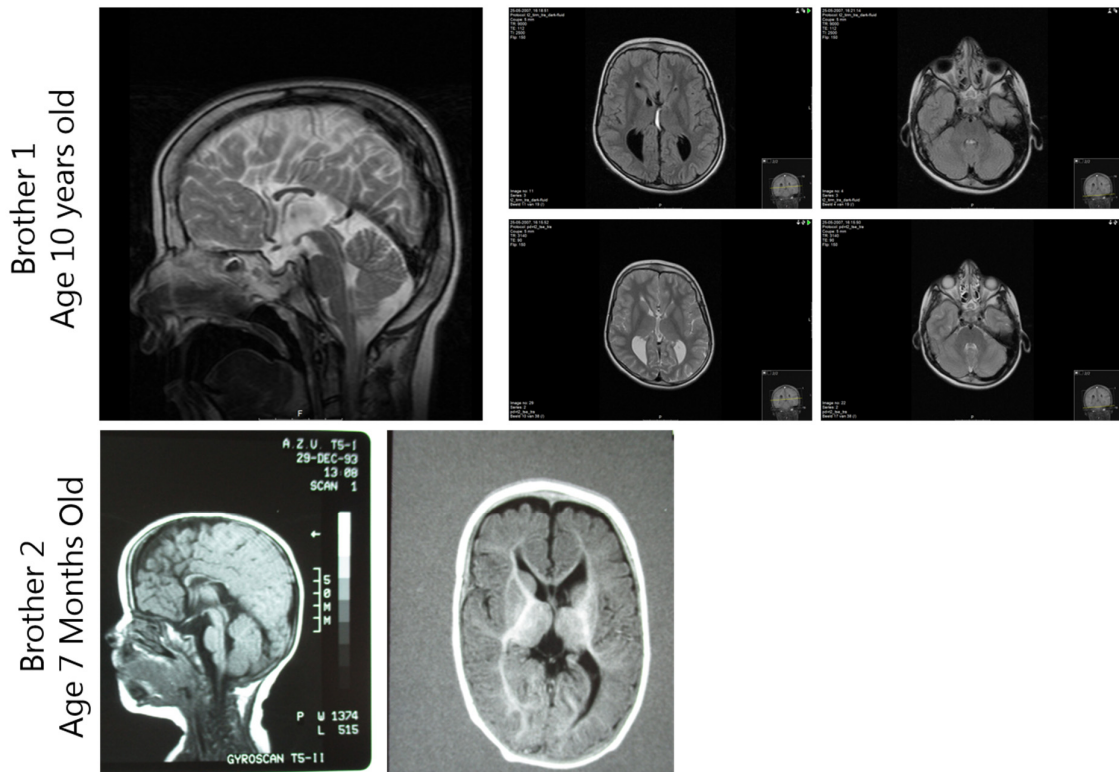

## USA 9

**Variant:** ChrX GRCh37(hg19) g.40999955T>C; NM\_001039590.2 c.701 T>C; NP\_001034679.2 p.F234S

**Discovery Platform:** Trio based whole exome sequencing

**Other variants of significance:** No. De-novo Heterozygous *POLG1* c1550 G>T; pGly517Val of unknown significance

**ACMG Classification:** Unknown significance.

**Authors:** Tyler Pierson, John M. Graham, Christine Shieh.

**Pedigree:**

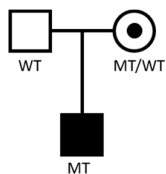

**Clinical Notes:**

Patient with intellectual disability, developmental delay, speech delay, autistic and obsessive behavior. Has hypotonia, athetoid movements, and is ataxic with a wide based gait. He wears ankle-foot orthoses and pronates badly when he walks. Sleep is disturbed with frequent awakenings. Has mild scoliosis. Has growth retardation and short stature. Dysmorphisms include broad forehead, flat nasal bridge, small nose, overhanging columella, up-slanted palpebral fissures, high palate, hyperextensible dislocatable thumbs, overcrowded upper teeth, low set and posterior rotated ears, prognathic lower jaw. Metabolic testing revealed low cysteine, mildly elevated asparagine, mildly elevated lactate, low 'free' carnitine.

## USA 3

**Variant:** ChrX GRCh37(hg19) g.41000406A>G; NM\_001039590.2 c.958A>G; NP\_001034679.2 p.R320G

**Discovery Platform:** Whole exome sequencing.

**Other variants of significance:** No

**ACMG Classification:** Unknown Significance

**Authors:** Scott Perry

**Pedigree:**

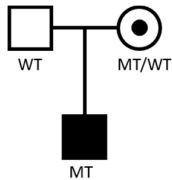

**Clinical Notes:**

Patient with global developmental delay, speech delay, epilepsy, autistic mannerisms, and hypotonia.

## Netherlands 9

**Variant:** ChrX GRCh37(hg19) g.41007713C>T; NM\_001039590.2 c.1511C>T; NP\_001034679.2 p.Ala504Val

**Discovery Platform:** Whole exome sequencing

**Other variants of significance:** No

**ACMG Classification:** Unknown significance

**Authors:** David Koolen, Tjitske Kleefstra

**Pedigree:**

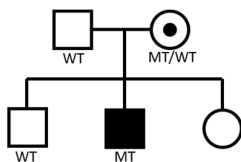

**Clinical Notes:**

Severe ID, Non verbal, Automutilation, Scoliosis



## Netherlands 12

**Variant:** ChrX GRCh37(hg19) g.41007751A>C; NM\_001039590.2 c.1549A>C; NP\_001034679.2 p.Ser517Arg

**Discovery Platform:** Trio based whole exome sequencing

**Other variants of significance:** No

**ACMG Classification:** Unknown significance

**Authors:** Serwet Demirdas

**Pedigree:**

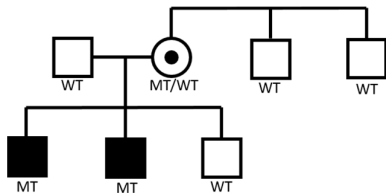

**Clinical Notes:**

2-year-old boy with developmental delay, specifically a speech-/language delay and walking difficulties. The walking difficulties are clinically difficult to distinguish between peripheral or central problem. His walking is broad-based with overstretching, foot lifters weakness and he has some extrapyramidal. Dysmorphic features are apparent: deepset eyes, frontal bossing, hypoplastic nails, inverted nipples etc. His growth parameters are within range. MRI of both the brain and the spine were unremarkable. Metabolic screening in plasma and urine, array results and sequencing of CGG-repeats in the FMR1 gene were normal. WES of a panel of 1174 genes contributing to intellectual disability showed a VOUS class 3 in the *USPX9* gene, inherited from his healthy mother. The patient has a brother with autism whom also carries the variant, and another brother and two healthy maternal uncles who do not carry the variant.

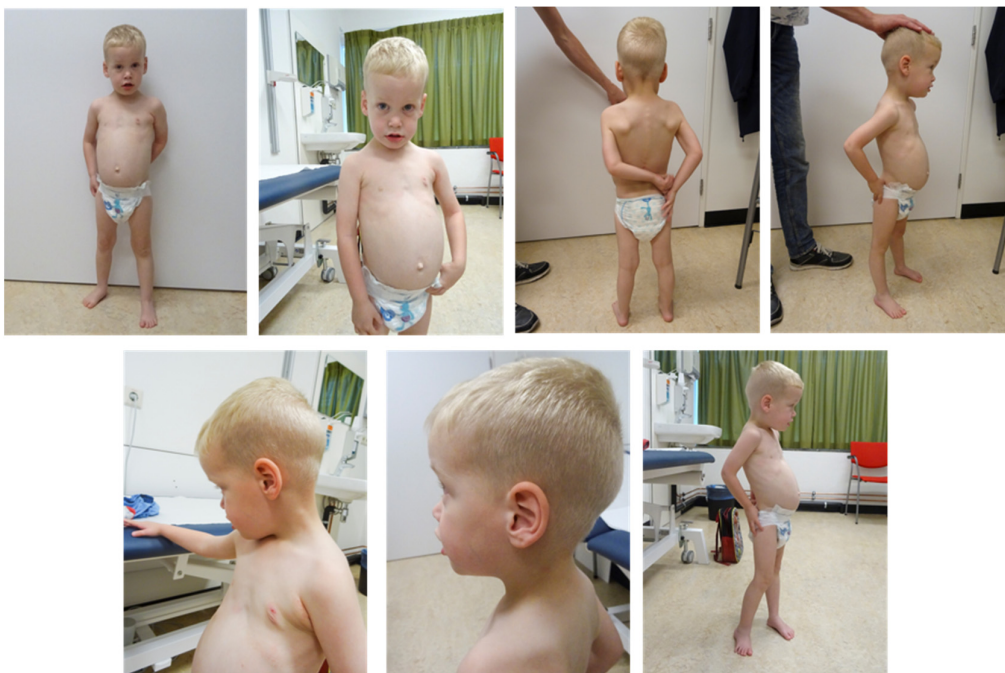

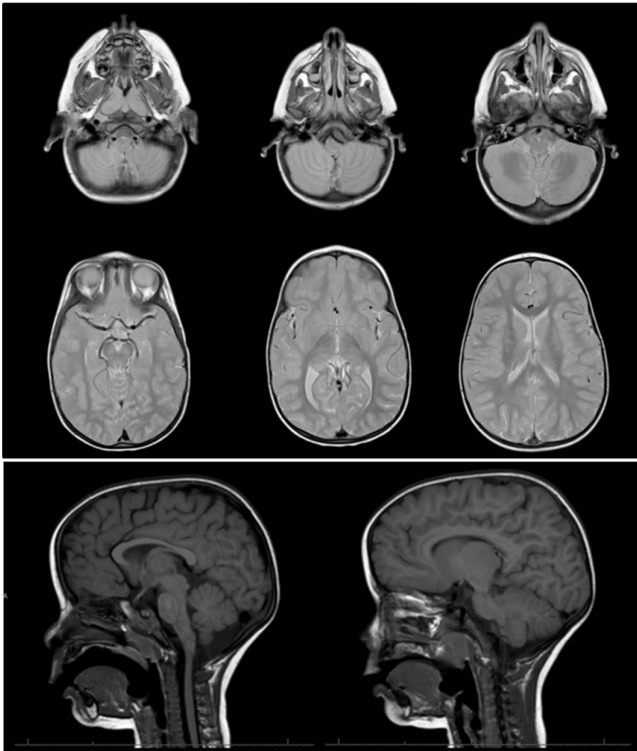

## USA 12

**Variant:** ChrX GRCh37(hg19) g.41029255C>T; NM\_001039590.2 c.2644 C>T; NP\_001034679.2 p.R882C

**Discovery Platform:** Quartet based whole exome sequencing

**Other variants of significance:** No.

**ACMG Classification:** Unknown significance.

**Authors:** Tyler Pierson, Bradley Schaefer, Noelle R Danylchuk.

**Pedigree:**

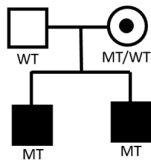

**Clinical Notes:**

Patient 1. Developmental delay, intellectual disability, speech delay but responded to therapy, obsessive about food, has ADHD, mild growth retardation and short stature. Has keratitis' on palms/soles.

Patient 2. Developmental delay, intellectual disability, obsessive about food, has ADHD. Has keratosis.

Mother with learning disability and psychiatric disorder.



## Canada 2

**Variant:** ChrX GRCh37(hg19) g.41029345A>G; NM\_001039590.2 c.2734A>G; NP\_001034679.2 p.Ile912Val

**Discovery Platform:** Trio based whole exome sequencing

**Other variants of significance:** No

**ACMG Classification:** Unknown significance

**Authors:** Tyler Pierson, Margot Van Allen, Tracy Oh.

**Pedigree:**

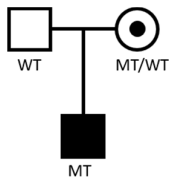

**Clinical Notes:**

Patient with global developmental delay, intellectual disability, speech delay and regression of language skills, autism, ADHD and has frequent tantrums. Dysmorphisms include broad forehead, dimpled chin and 5th finger brachydactyly.

## Netherlands 10

**Variant:** ChrX GRCh37(hg19) g.41043278C>A; NM\_001039590.2 c.3176C>A; NP\_001034679.2 p.Ala1059Asp

**Discovery Platform:** Trio based whole exome sequencing

**Other variants of significance:** No. Maternally inherited variant in the RANBP2 gene (RANBP2 (NM\_006267.4): c.[7418A>G];[=] p.[(Glu2473Gly)];[=]) (Chr2(GRCh37):g.[109384413A>G];[=]) of unknown significance

**ACMG Classification:** Unknown significance

**Authors:** Renske Oegema, Bert van der Zwaag, E. van Binsbergen

**Pedigree:**

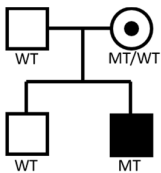

**Clinical Notes:**

This boy was born with cesarean section at 37 weeks of gestation. The last week of the pregnancy were complicated by preeclampsia and polyhydramnios. Birth weight 2400 grams. He had feeding difficulties during the first months with nasal

regurgitation. There was excessive drooling till 8 months. His motor development was delayed, he walked independently at 23 months. He also had a speech delay, started speaking at almost 3 years of age, with hypernasality and articulation difficulties. Intensive speech therapy was beneficial. He is very shy in communication with strangers. At 3 years of age he was diagnosed with velopharyngeal insufficiency. He was successfully operated at 4 years. He is now 5 years of age and attends regular education.

Clinical genetic examination (age 4): OFC -1 sds, height -1 sds, weight +1 SDS. A boy with a prominent forehead, full upper eyelids, low nasal bridge, broad mouth. He has broad thumbs.

At 3years 10 months he presented with an epileptic seizure - generalized tonic-clonic. Two weeks later he presented with status epilepticus and was started on anti-epileptic drug. Brain MRI was normal. SNP array.

## Netherlands 1

**Variant:** ChrX GRCh37(hg19) g.41043370T>C; NM\_001039590.2 c.3268T>C; NP\_001034679.2 p.Tyr1090His

**Discovery Platform:** whole exome sequencing.

**Other variants of significance:** ARID1B. Chr6 (GRCh37): g.157528688T>G; NM\_020732.3: c.6413T>G p.Leu2138Arg (de-novo)

**ACMG Classification:** Unknown Significance

**Authors:** Tjitske Kleefstra and Margot Reijnders

**Pedigree:**

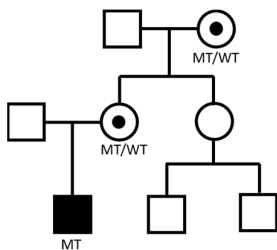

**Clinical Notes:**

Patient has ID, epilepsy, no speech, scoliosis (not progressive), thin hair, facial dysmorphisms: hypertelorism, macrostomia, full eyebrows, low frontal hairline. Skin abnormalities in Blaschkolines. MRI: absent distal part corpus callosum. N.B. There is no skewed X-inactivation present in mother and grandmother. Mother has epilepsy.

## Netherlands 7

**Variant:** ChrX GRCh37(hg19) g.41045786A>G; NM\_001039590.2 c.3575A>G; NP\_001034679.2 p.His1192Arg

**Discovery Platform:** Trio based whole exome sequencing

**Other variants of significance:** No

**ACMG Classification:** Unknown significance.

**Authors:** Tjitske Kleefstra, Margot Reijnders

**Pedigree:**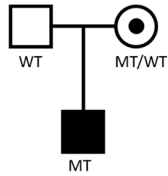**Clinical Notes:**

Patient with severe intellectual disability, global developmental delay, speech delay (only few words), autistic behaviour, motor disability (wheelchair for long distances), ataxia and anxiety. Patient has microcephaly. Facial dysmorphisms including macrostomia, large ears, small and high nasal bridge. Patient has constipations.

**USA 21**

**Variant:** ChrX GRCh37(hg19) g.41045833C>T; NM\_001039590.2 c.3622 C>T; NP\_001034679.2 p.Pro1208Ser

**Discovery Platform:** Trio based whole exome sequencing

**Other variants of significance:** No

**ACMG Classification:** Unknown significance

**Authors:** Kelly Schoch, Loren Pena, Undiagnosed Disease Network

**Pedigree:**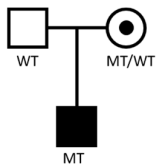**Clinical Notes:**

4 year old Hispanic male with global developmental delay, moderate intellectual disability, speech delay (only a few words), many febrile seizures from 19-28 months of age (mild diffuse slowing on EEG), hypotonia, motor disability (assisted walking), ataxia, visual impairment (intermittent downbeat nystagmus). Patient had intrauterine growth restriction and post-nataly had growth retardation, short stature and microcephaly. Brain MRI showed mild prominence of sulci in the frontal poles bilaterally at 14 months and possible T2 signal hyperintensity involving the periventricular WM in the frontal lobes and possible mildly delayed myelination at 3 years old. Dysmorphisms include upslanting palpebral fissures, almond shaped and mildly wide spaced eyes, sacral dimple, round and cupped ears with simple helices and mild hypertelorism. Has constipation, and has osteopenia with recurrent bone fractures (may be due to rickets of prematurity).

**USA 11**

**Variant:** ChrX GRCh37(hg19) g.41048705C>G; NM\_001039590.2 c.3954 C>G; NP\_001034679.2 p.D1318E

**Discovery Platform:** Trio based whole exome sequencing

**Other variants of significance:** No. Compound heterozygous CDK11A variants (both inherited) E513K, G118R. Unknown significance.

**ACMG Classification:** Unknown significance.

**Authors:** Tyler Pierson, Kamer Tezcan.

**Pedigree:**

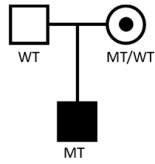

**Clinical Notes:**

Developmental delay and regression, intellectual disability, speech delay, autism and ADHD, impaired hearing (corrected by surgery). Brain MRI was normal. Frequent vomiting independent of food intake.

## USA 22

**Variant:** ChrX GRCh37(hg19) g.41057869C>T; NM\_001039590.2 c.4469C>T; NP\_001034679.2 p.Pro1490Leu

**Discovery Platform:** Trio based whole exome sequencing

**Other variants of significance:** No; ChrX(GRCh37):g.20179844G>A; NM\_004586.2(RPS6KA3):c.1877C>T; p.(Pro626Leu) of unknown significance.

**ACMG Classification:** Unknown significance

**Authors:** Filippo Pinto e Vairo, Pavel N. Pichurin, Sarah A. Ewing, Sarah S. Barnett, Eric W. Klee

**Pedigree:**

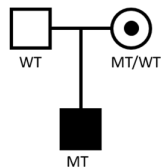

**Clinical Notes:**

6-year-old male with a history of autism, speech delay, abnormal EEG and Focal versus generalized epilepsy of unknown etiology. Also, his HC is at p5, he has mild medial flaring of eyebrows, nonspecific white matter abnormalities, hypertrichosis, and generally nondysmorphic. EEG showed mild diffuse slowing, bifrontal spikes and sharp waves, and intermixed bursts of generalized atypical spike and wave discharges occurring with the bifrontal discharges.

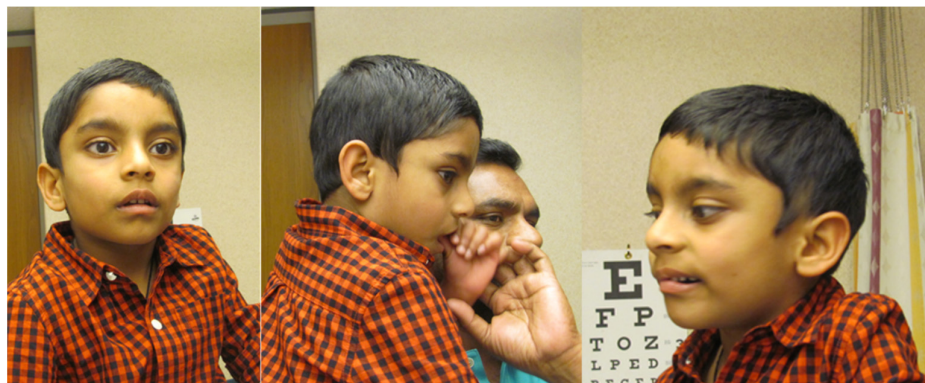

## Spain 2

**Variant:** ChrX GRCh37(hg19) g.41060527C>A; NM\_001039590.2 c.4818C>A; NP\_001034679.2 p.Asp1606Glu

**Discovery Platform:** Trio based whole genome sequencing

**Other variants of significance:** No

**ACMG Classification:** Unknown significance.

**Authors:** Alberto Fernandez-Jaén.

**Pedigree:**

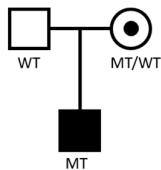

**Clinical Notes:**

Patient clinical features include unilateral deafness (hypoplasia of cochlear nerve), microcephaly, short stature, mild intellectual disability, speech delay, and no dysmorphic features. Other studies (metabolic, serologies, ocular, muscular) were normal.

## USA 17

**Variant:** ChrX GRCh37(hg19) g.41064568C>A; NM\_001039590.2 c.4837C>A; NP\_001034679.2 p.P1613T.

**Discovery Platform:** Trio based whole exome sequencing

**Other variants of significance:** SORC21 c.1977G>T p.Q659H (de novo; may contribute). Duplication 9q21.2; 525.93kb, 5 genes – unknown significance.

**ACMG Classification:** Unknown significance.

**Authors:** Tyler Pierson, Alexander Asamoah, Kelly Jackson.

**Pedigree:**

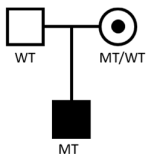

**Clinical Notes:**

Subject is a 6yo male former full-term child intrauterine growth retardation, short stature with macrocephaly. He has a history of motor delay and speech delays, episodes of hypoglycemia, and cyclic vomiting. The hypoglycemia/vomiting episodes have resolved for the most part, except when he is ill and he can get hypoglycemic quite easily. He has had GERD as well and is thought to possess a genetic marker for Crohn disease (he does not have it). He is non-dysmorphic and has left exotropia. No family history of childhood onset neurological/developmental disease. Family is non-consanguineous.

At ~2yoa he had several episodes that seemed like staring spells/absence seizures, but EEG was normal and he has not had any further episodes since. He had an MRI brain, that father thought was normal, but did not provide a report. He was a late walker at 18mos, but currently does not exhibit any motor issues. He was also a late talker and still has some minor cognitive and speech issues.

## USA 26

**Variant:** ChrX GRCh37(hg19) g.41064704G>A; NM\_001039590.2 c.4973G>A; NP\_001034679.2 p.Arg1658Gln

**Discovery Platform:** Trio based whole exome sequencing

**Other variants of significance:** No

**ACMG Classification:** Unknown significance

**Authors:** Vandana Shashi, Jennifer A. Sullivan, Ioana Cutcutache

**Pedigree:**

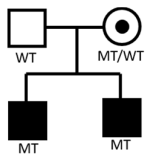

**Clinical Notes:**

6 year old male with epilepsy with history of prolonged status epilepticus, acquired microcephaly, and global developmental delays. Seizure control is good with phenobarbital. Walked independently at 4.5 years. Profound Speech delay with Expressive > receptive. He is functionally non- verbal. 9 year old full brother is significantly delayed with reading skills and mildly delayed with math skills. His developmental milestones were normal except for a mild speech delay. He has ADHD. Father required special education in school.

## Canada 6

**Variant:** ChrX GRCh37(hg19) g.41077774T>C; NM\_001039590.2 c.6359T>C; NP\_001034679.2 p.I2120T

**Discovery Platform:** Whole exome sequencing.

**Other variants of significance:** No

**ACMG Classification:** Unknown Significance

**Authors:** Saadet Mercimek-Andrews

**Pedigree:**

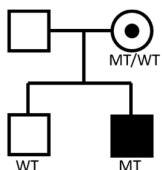

**Clinical Notes:**

At age of 9 ¼ years phenotype consisted of ID, hypotonia from his first year, fine motor delay, speech language delay, history of developmental regression, febrile seizures (onset 21 months ) and after age 3 refractory epilepsy (of different types, generalized tonic clonic, atonic, myoclonic, absence) refractory to multiple anti-epileptic medications (Phenobarb, valproate, clobazam, lamotrigine, keppra) and the ketogenic diet. Non dysmorphic appearance. Brain MRI was normal at the age of 2 years, whereas showed increased T2 signal intensity in the left middle frontal gyrus, raising the question of low-grade glioma at the age of 6 years old. His neuropsychological assessment showed moderate ID with markedly restricted functions for speaking, walking and mental functions necessary for everyday life.

**USA 28**

**Variant:** ChrX GRCh37(hg19) g.41084144A>C; NM\_001039590.2 c.6901A>C; NP\_001034679.2 p.Lys2301Gln

**Discovery Platform:** Trio based whole genome sequencing

**Other variants of significance:** No

**ACMG Classification:** Unknown significance

**Authors:** Daniel Koboldt

**Pedigree:**

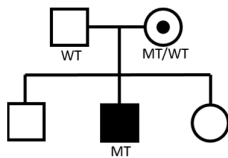**Clinical Notes:**

Patient is a currently 4-year-old male who was born at full term after an uncomplicated pregnancy weighing 6lbs, 9oz. He had some issues with feeding in the neonatal period, including poor latching for breastfeeding. His general health was good, and he first came to attention at age 9 months when concern was raised about hypotonia and motor delay. At age 4, he still cannot walk independently though has been cruising since about 18 months. He knows 2-3 single words and a few signs. Other features include chronic drooling and tremor that has been described by his pediatric neurologist as a cerebellar tremor. Cranial MRI obtained at 3 years was unremarkable. Acanthocytes were reportedly seen on CBC smear, but a repeat smear was normal. *MTTP* gene sequencing and deletion/duplication testing was negative. Whole exome sequencing was performed and 3 variants of unknown significance were identified: paternally inherited variants in *CACNA1A* and *COL6A2*, and maternally inherited *USP9X* variant. Deletion/duplication testing for *COL6A2* was performed and negative. Whole genome sequencing was performed on a research basis, and the patient was found to carry other variants of unknown significance in several genes. It is unclear at this time whether or not any of these could be contributing to this patient's phenotype.

**Netherlands 3**

**Variant:** ChrX GRCh37(hg19); g.41089041dup;

Long isoform: NM\_001039590.2 c.7440dup; NP\_001034679.2 p.Ala2481fs

Short isoform: NM\_001039590 c.[0]; NP\_001034679 p.[0]

**Discovery Platform:** whole exome sequencing (both affected brothers and both parents)



**Other variants of significance:** No

**ACMG Classification:** Unknown Significance

**Authors:** Peter VanHasselt

**Pedigree:**

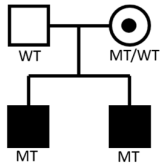

**Clinical Notes:**

Both patients displayed intrauterine growth restriction. Both present with global developmental delay, intellectual disability, autistic behaviour. Both had microcephaly. Both had transient (after birth) hypoglycaemia and elevated tyrosine. Both have feeding difficulties and one diagnosed with gastro-esophageal reflux.

## Canada 1

**Variant:** ChrX GRCh37(hg19); g.41089041dup;

Long isoform: NM\_001039590.2 c.7440dup; NP\_001034679.2 p.Ala2481fs  
Short isoform: NM\_001039590 c.[0]; NP\_001034679 p.[0]

**Discovery Platform:** Whole exome sequencing

**Other variants of significance:** No

**ACMG Classification:** Unknown Significance

**Authors:** Mathew Lines

**Pedigree:**

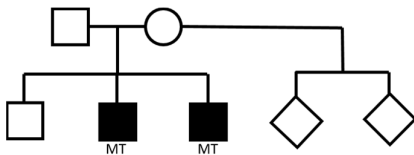

**Clinical Notes:**

Family History

Paternal family history: (non-contributory) aortic valve surgery (for aortic regurgitation). Cerebellar stroke. Attention deficit. Brother (paternal uncle to probands) with cerebral palsy and had severe developmental delay ("toddler level" according to family). Father's ethnic background is 'Caucasian' (paternal) and Austrian/Hungarian (maternal). Maternal family history: Mother denies learning problems; did have seizures as a child, but these resolved at age seven, and she has required no medication since. Mother has several family members with bipolar disorder. She is of mixed French Canadian/Italian/Irish/First Nations ancestry.

## Younger Brother

Born at term weighing 6 lbs 12 oz. Mother was a 30 year old G5P4A1 at the time of delivery. He was delivered by repeat C-section and had an uncomplicated neonatal course. Boy with Global developmental delay. (1) Gross motor: Sat unsupported at 16 months; Prone ('commando') crawl at 2 years. At 5 ½ years: Pull to stand, ambulate with walker, eat with spoon, scribble with fist grip, no writing, some speech (dysarthric), not toilet trained. (2) Cerebellar ataxia (truncal, postural, extremities) – needs walker for ambulation (3) Hypotonia (4) Generalized tonic-clonic seizures (six episodes, always in context of febrile illness) requiring no medications. Physical Exam: Growth (age 7 years); Height: 118 cm (24 %, Z = -0.70, Source: WHO Growth Chart for Canada); Weight: 30 kg (97 %, Z = 1.86, Source: WHO Growth Chart for Canada); Head circumference: 52.8 cm (62nd centile). Appearance is nondysmorphic and in keeping with parents. The major exam finding is marked limb and gait ataxia, which expressed itself both in terms of dramatic gait instability, marked dysmetria and dysdiadochokinesis, and dysarthria. He was able to sit on the edge of the exam table unassisted. Extraocular movements were full. Tone was reduced with no ankle clonus; reflexes were normal; plantar responses were flexor. Brain MRI: Enlarged vermian fissures and CSF between cerebellar lobes, in keeping with atrophy of the anterior vermis (region from the lingula to the tuber) without evidence of hypoplasia. The cerebellar hemispheres are within normal limits. The corpus callosum has a slightly thick appearance. All of the following were normal: Microarray (SNP), SCA panel (repeat enumeration SCAs 1-3, 6-8, and 17), Transferrin isoelectric focusing, AFP, VLCFAs, Monogenic ataxia NGS panel (U. Chicago) (negative for mutations in any of the 346 genes included in the panel) (\*done as an exome slice, see below). The USP9X diagnosis was made upon inspection of the remaining (off-panel) exome variants from the U. Chicago ataxia panel.

## Elder Brother

Born at term by (repeat) Caesarean section, weighing 6 lbs 12 oz. Mother was a 30 year old G5P4A1 at the time of delivery. Neonatal course was uncomplicated. Boy with (1) Global developmental delay, (2) central hypotonia, (3) Cerebellar ataxia, (4) Strabismus (s/p surgery) No seizures. Development: Delays recognized ~6mo. Is considered to be less cognitively affected than his brother. Roll over 14mo. Sit unsupported 2.5 years. At 7y 11mo: Attends a modified Grade 3 program. Can walk a few independent steps, or for long distances in his walker. He is able to feed himself with a knife, fork, or spoon, and can write his name with some errors. His speech consists of complete sentences, including pronouns and plurals, and his speech is slow but relatively understandable. He exhibits normal eye contact and is toilet-trained. Growth (7y 11mo): Height: 127.1 cm (21 %, Z = -0.80, Source: WHO Growth Chart for Canada); Weight: 29 kg (61 %, Z = 0.29, Source: WHO Growth Chart for Canada); Head circumference: 53.1 cm (58th centile). The main findings on exam are marked gait and limb ataxia. Reflexes are normal. Plantar responses are down-going. Investigations: EMG / Nerve conduction studies normal; Brain MRI findings similar to those seen in brother (anterior vermis atrophy; thick corpus callosum); Microarray, TIEF, AFP, VLCFAs, monogenic ataxia panel (U. Chicago) – all normal.

Younger brother  
Photos: 7y 5mo  
MRI: 5y 9mo

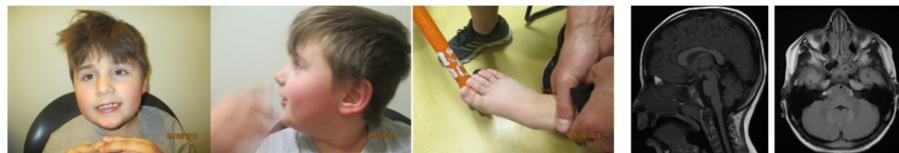

Elder brother  
Photos: 9y 4mo  
MRI: 6y 7mo

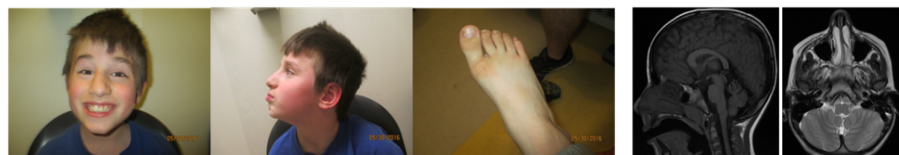

## Canada 3

**Variant:** ChrX GRCh37(hg19); g.41089041dup;

Long isoform: NM\_001039590.2 c.7440dup; NP\_001034679.2 p.Ala2481fs

Short isoform: NM\_001039590 c.[0]; NP\_001034679 p.[0]

**Discovery Platform:** Trio based whole exome sequencing

**Other variants of significance:** No

**ACMG Classification:** Unknown significance

**Authors:** Tyler Pierson, Christine Shieh.

**Pedigree:**

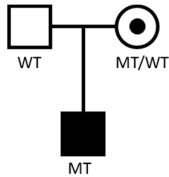

**Clinical Notes:**

Patient with global developmental delay, intellectual disability, speech delay, autism, primary generalized epileptiform activity on EEG but no clinical seizures. Also with anxiety and some obsessions. Has macrocephaly. Dysmorphisms include borderline brachydactyly, sacral dimple, broad forehead, dimpled chin, very mild asymmetry of face. Also has hyperextensibility of metacarpophalangeal joints displays and genu valgum. Has feeding difficulties requiring tube feeding.

## Netherlands 5

**Variant:** ChrX GRCh37(hg19) g.41091697C>T; NM\_001039590.2 c.7633C>T; NP\_001034679.2 p.P2545S

**Discovery Platform:** Whole exome sequencing.

**Other variants of significance:** No. Variant of unknown significance NM\_015176.3 FBXO28 c.1070\_1073delCTCT p.(S357Lfs\*28) de novo and heterozygous.

**ACMG Classification:** Unknown Significance

**Authors:** Janneke Weiss, Petra Zwijsenburg

**Pedigree:**

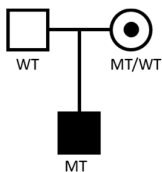

**Clinical Notes:**

Patient had intrauterine growth restriction. Postnatally, growth within target height range, with no dysmorphisms, global developmental delay, absent speech and autism. Brain MRI revealed delayed myelinisation, otherwise no abnormalities.

## Netherlands 2

**Variant:** ChrX GRCh37(hg19) g.41000604G>C; NM\_001039590.2 c.1081G>C; NP\_001034679.2 p.Val361Leu

**Discovery Platform:** whole exome sequencing.

**Other variants of significance:** No

**ACMG Classification:** Likely Benign – Found in healthy male relative

**Authors:** Tjitske Kleefstra and Margot Reijnders

**Pedigree:**

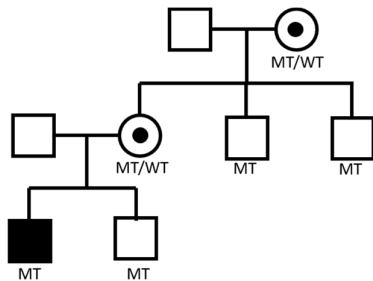

## Netherlands 6

**Variant:** ChrX GRCh37 (hg19) g.41002691G>A; NM\_001039590.2 c.1309G>A; NP\_001034679.2 p.Ala437Thr

**Discovery Platform:** Whole exome sequencing.

**Other variants of significance:** No

**ACMG Classification:** Likely Benign – Found in healthy male relative (maternal uncle – not shown)

**Authors:** Tjitske Kleefstra and Margot Reijnders

**Pedigree:**

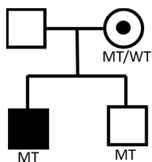

## Swiss 1

**Variant:** ChrX GRCh37(hg19) g.41031160A>G; NM\_001039590.2 c.3097A>G; NP\_001034679.2 p.Met1033Val

**Discovery Platform:** Whole exome sequencing

**Other variants of significance:** No

**ACMG Classification:** Likely Benign – Found in healthy brother

**Authors:** Pascal Joset

**Pedigree:**

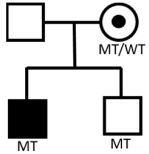

Severe global DD, Dandy Walker formation and hypoplasia of cerebellum.

## Norway 1

**Variant:** ChrX GRCh37(hg19) g.41043275G>A; NM\_001039590.2 c.3173G>A; NP\_001034679.2 p.Arg1058Lys

**Discovery Platform:** Trio based Disease exome sequencing, (4813 gene Illumina TruSightOne “Mendeliome” panel).

**Other variants of significance:** No

**ACMG Classification:** Likely Benign (variant found in healthy male relative)

**Authors:** Marie Falkenberg Smeland

**Pedigree:**

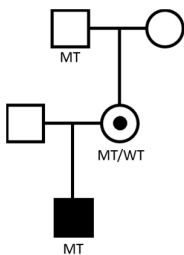

## Canada 5

**Variant:** ChrX GRCh37(hg19) g.41043684C>A; NM\_001039590.2; c.3314C>A; NP\_001034679.2 p.Pro1105His

**Discovery Platform:** Whole exome sequencing

**Other variants of significance:** No

**ACMG Classification:** Likely Benign (Found in unaffected maternal aunt who has Turner syndrome)



**Authors:** Mathew Lines

**Pedigree:**

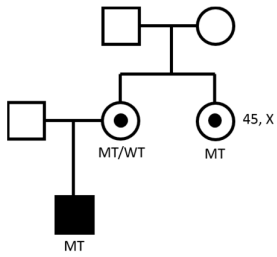

## Netherlands 4

**Variant:** ChrX GRCh37(hg19) g.41043792T>C; NM\_001039590.2 c.3422T>C; NP\_001034679.2 p.M1141T

**Discovery Platform:** whole exome sequencing.

**Other variants of significance:** No

**ACMG Classification:** Likely Benign – Found in healthy male relative

**Authors:** Tjitske Kleefstra and Margot Reijnders

**Pedigree:**

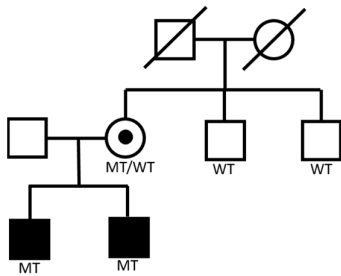

## Netherlands 8

**Variant:** ChrX GRCh37(hg19) g.41055921A>G; NM\_001039590.2 c.4163A>G; NP\_001034679.2 p.Asn1388Ser

**Discovery Platform:** Trio based whole exome sequencing

**Other variants of significance:** No

**ACMG Classification:** Likely Benign. –Hemizygous alleles found in gnomAD.

**Authors:** Tjitske Kleefstra, Margot Reijnders

**Pedigree:**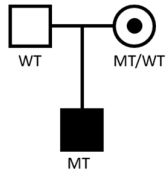**Belgium 1**

**Variant:** ChrX GRCh37(hg19) g.41064560A>G; NM\_001039590.2 c.4829A>G; NP\_001034679.2 p.Asn1610Ser

**Discovery Platform:** Trio based Disease exome sequencing (3989 genes, SeqCap EZ Choice XL, NimbleGen Roche)

**Other variants of significance:** No.

**ACMG Classification:** Likely benign

**Authors:** Lionel Van Maldergem, Julie Désir, Martina Marangoni

**Pedigree:**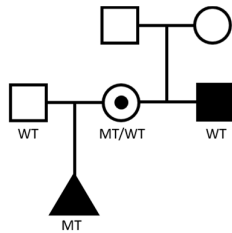**FRANCE 1**

**Variant:** ChrX GRCh37 (hg19) g.41075489G>A; NM\_001039590.2 c.5669G>A; NP\_001034679.2 p.Gly1890Glu

**Discovery Platform:** Trio-based whole exome sequencing.

**Other variants of significance:** Missense change in *H3F3A* [Chr1(GRCh37):g.226259121G>C NM\_002107.4:c.352G>C p.(Val118Leu)] considered likely pathogenic.

**ACMG Classification:** Likely Benign – Found in healthy male relative.

**Authors:** Sebastien Kury, Sandra Mercier

**Pedigree:**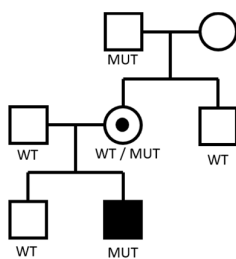

## USA 4

**Variant:** ChrX GRCh37(hg19) g.41075489G>A; NM\_001039590.2 c.5669G>A; NP\_001034679.2 p.Gly1890Glu

**Discovery Platform:** Whole exome sequencing

**Other variants of significance:** No

**ACMG Classification:** Likely Benign (Found in healthy male in case France 1)

**Authors:** Mary Kay Koenig

**Pedigree:**

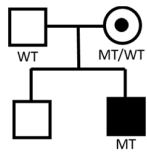

## Germany 1

**Variant:** ChrX GRCh37(hg19) g.41077775A>G; NM\_001039590.2 c.6360A>G; NP\_001034679.2 p.Ile2120Met

**Discovery Platform:** whole exome sequencing.

**Other variants of significance:** No

**ACMG Classification:** Likely Benign – Variant found in healthy male relative, Hemizygous alleles found in gnomAD

**Authors:** Nicola Dikow, Ute Moog

**Pedigree:**

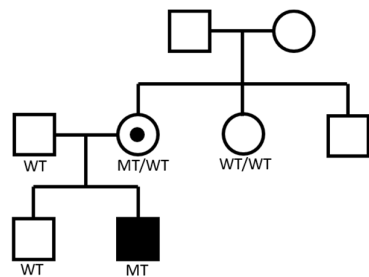

## USA 29

**Variant:** ChrX GRCh37(hg19) g.4107775A>G; NM\_001039590.2 c.6360A>G; NP\_001034679.2 p.Ile2120Met

**Discovery Platform:** Trio based whole genome sequencing

**Other variants of significance:** No.

**ACMG Classification:** Likely Benign. Variant found in healthy a male in family Germany 1, Hemizygous alleles found in gnomAD

**Authors:** Scott E. Hickey

**Pedigree:**

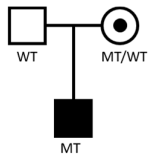

## Denmark 1

**Variant:** ChrX GRCh37(hg19) g.41082482A>G; NM\_001039590.2 c.6578A>G; NP\_001034679.2 p.Lys2193Arg

**Discovery Platform:** whole exome sequencing.

**Other variants of significance:** No

**ACMG Classification:** Likely Benign – Found in healthy male relative

**Authors:** Sabine Grønberg

**Pedigree:**

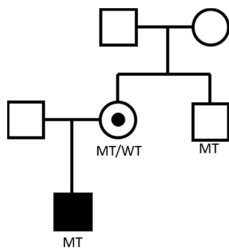

### Supplemental References

1. Zhang Q, Dong A, Walker JR, Bountra C, Arrowsmith CH, Edwards AM, et al. (2018): *Crystal structure of a peptidase*. <http://www.rcsb.org/structure/5WCH>.
2. Reijnders MR, Zachariadis V, Latour B, Jolly L, Mancini GM, Pfundt R, et al. (2016): De Novo Loss-of-Function Mutations in USP9X Cause a Female-Specific Recognizable Syndrome with Developmental Delay and Congenital Malformations. *Am J Hum Genet.* 98:373-381.
